# Supplementary material
Source: MDPI journal article supplement (https://www.mdpi.com/1999-4907/11/9/1010)
Supplement: s1 [file s1]

## Sheet: Sheet1
Table S1. Raw data of leaf measures
Dataset Code	n	Length (cm)	Width (cm)	Area (cm2)	Perimeter (cm)	Dry Mass (g)	Fresh Mass (g)
1	4969	6.85629	8.32518	52.0414	34.6288	0.2235	0.6859
1	4992	6.23313	10.4444	75.1912	48.9024	0.31	0.9844
1	4978	7.78522	8.59471	50.6191	31.0424	0.1978	0.6111
1	4987	8.67891	8.28254	45.2412	32.9381	0.1785	0.6206
1	4988	8.30163	7.73162	35.0647	29.3902	0.118	0.4417
1	4962	6.62889	7.64346	42.7502	28.9414	0.1337	0.5037
1	4989	8.68067	8.57128	43.6439	35.5519	0.1629	0.584
1	4986	6.10191	8.43222	46.6514	30.7934	0.145	0.4715
1	4991	9.15241	8.97239	66.0913	33.4465	0.3556	1.0483
1	4989	7.25785	8.61881	53.1801	34.5611	0.1785	0.6323
1	4974	8.46563	9.30057	67.3205	33.5233	0.3697	1.0864
1	4988	9.44605	8.45358	58.3345	30.9552	0.274	0.8834
1	4828	5.81477	8.20688	42.8405	31.0933	0.172	0.5675
1	4985	6.92214	7.19739	33.8343	28.6227	0.1309	0.4713
1	4981	7.56386	8.41687	47.7072	33.4394	0.1994	0.6318
1	4978	9.26772	7.85151	41.3351	30.0544	0.1252	0.5495
1	4976	7.64152	6.76708	35.1998	26.8249	0.1072	0.4897
1	4971	9.04175	8.26142	48.6111	36.025	0.1867	0.6721
1	4984	9.84097	10.2253	66.2668	42.5183	0.2427	0.6419
1	4972	8.57945	10.4642	51.7095	38.8142	0.1884	0.5463
1	4996	10.0913	10.7793	70.5018	45.1057	0.2824	0.7917
1	4983	10.547	9.10545	66.9456	38.8918	0.2766	0.9936
1	4990	10.6893	9.86683	67.6577	39.4303	0.2918	0.9469
1	4986	7.87141	9.37096	48.4676	36.6921	0.1566	0.473
1	4990	9.37809	10.2683	72.9903	46.4148	0.3062	0.9902
1	4981	10.372	11.7826	74.4633	51.5082	0.2532	0.859
1	4991	8.38796	9.14473	57.9913	40.9509	0.2068	0.5838
1	4989	8.19802	8.40634	47.1691	37.7734	0.2247	0.6904
1	4983	9.28061	10.0221	66.1021	41.7453	0.2536	0.9635
1	4991	9.25883	8.99661	57.9789	34.1595	0.2271	0.5788
1	4987	10.175	8.87828	69.2413	39.2856	0.2972	0.9592
1	4980	10.9204	9.73188	77.6022	42.3606	0.3481	0.9604
1	4980	8.92639	9.40965	61.3307	37.5504	0.2309	0.7506
1	4992	8.11234	8.43648	52.3525	34.7993	0.1685	0.7461
1	4973	8.10823	8.3025	46.2809	30.5198	0.1379	0.5309
1	4990	9.41721	8.19305	48.9446	35.9095	0.1969	0.7315
1	4994	10.0211	10.3482	72.9065	44.0806	0.3294	1.1362
1	4984	10.2277	9.67407	54.6157	33.3946	0.1854	0.5408
1	4987	9.78323	8.95205	59.3643	35.9457	0.1894	0.5928
1	4990	10.2488	9.9647	68.7779	43.4667	0.2647	0.9367
1	4991	9.78026	8.7408	54.0979	37.2268	0.2147	0.635
1	4988	9.1188	8.44126	55.4162	38.1481	0.2082	0.7411
1	4977	9.01011	8.07052	45.4916	30.57	0.1362	0.4999
1	4985	7.84985	7.84209	40.9349	27.7094	0.1357	0.5227
1	4996	10.1987	10.8337	73.9884	45.5457	0.2587	0.7843
1	4987	9.81086	10.2969	73.1936	44.814	0.2633	0.9533
1	4996	10.1027	10.6036	69.2682	50.0837	0.2305	0.8067
1	4994	8.97504	11.0673	70.0562	43.7983	0.2432	0.813
1	4966	7.21932	5.88941	27.5064	23.2412	0.0808	0.2987
1	4985	7.83974	7.21308	33.6888	26.8302	0.1115	0.3991
1	4986	8.73963	8.53101	47.0668	32.931	0.1385	0.4709
1	4988	8.73198	8.70875	46.6014	31.9749	0.1523	0.5689
1	4982	8.24768	9.02479	50.105	38.4098	0.1544	0.564
1	4984	8.91838	9.64287	57.1927	47.9414	0.1826	0.64
1	4984	8.32619	8.91814	52.9891	37.0672	0.1731	0.6258
1	4983	7.15582	8.25524	42.9299	32.8739	0.1281	0.4601
1	4990	9.57291	12.0691	74.0134	49.3206	0.268	0.9197
1	4981	7.67652	6.55217	32.851	25.5235	0.1007	0.3456
1	4984	9.14583	8.2092	47.5515	29.9312	0.1475	0.5523
1	4990	9.0437	8.7509	50.5642	31.8181	0.1621	0.6248
1	4976	10.9128	9.35727	66.3269	36.4161	0.1812	0.7237
1	4980	8.23531	10.1768	64.4005	38.7477	0.2021	0.7133
1	4989	10.6144	10.7922	73.644	43.5571	0.2659	0.9572
1	4990	10.7227	12.5506	73.0399	52.0461	0.2726	0.9993
1	4995	10.2052	10.9936	77.5868	50.0917	0.2693	0.945
1	4994	10.0094	11.3148	68.2795	46.3637	0.2529	0.9039
1	4984	7.74399	10.9657	57.8593	40.7782	0.2273	0.7281
1	4966	9.95386	11.4796	79.1998	48.9097	0.2805	0.9477
1	4997	10.1004	9.27898	56.4184	35.4481	0.1923	0.7432
1	4983	8.38563	7.84509	42.3018	29.4409	0.1329	0.4983
1	4974	7.6548	6.51091	35.373	24.9152	0.1109	0.4216
1	4981	7.8689	6.82536	35.078	28.4753	0.102	0.3961
1	4988	9.13577	8.99116	58.0684	37.1926	0.1872	0.6824
1	5000	8.83159	9.74384	57.1306	40.1657	0.1767	0.6899
1	4973	7.32576	7.17537	40.6596	27.5246	0.1261	0.4741
1	4988	11.1331	10.8001	69.7743	48.0778	0.2555	0.9344
1	4979	8.0318	7.78999	45.5024	29.391	0.1321	0.5229
1	4989	9.47577	11.6844	73.6633	53.0418	0.2562	0.9044
1	4986	9.20184	10.5185	65.3926	52.356	0.2245	0.7874
1	4992	6.11489	10.6158	65.4842	45.7981	0.2249	0.7453
1	4995	10.7933	11.3503	70.9948	50.5921	0.3214	0.9016
1	4986	9.5124	11.8591	75.9911	50.0509	0.2562	0.9419
1	4992	7.83103	10.9501	89.2771	45.9954	0.363	1.131
1	4989	6.29851	8.48639	37.7604	36.7546	0.1342	0.4915
1	4985	8.53517	10.8837	69.6759	46.8334	0.2333	0.8514
1	4992	8.62883	9.3646	62.4095	39.8217	0.194	0.654
1	4992	10.512	10.8234	75.1608	44.0886	0.2388	0.8159
1	4975	7.89331	8.93397	47.7373	33.2572	0.1375	0.5333
1	4983	7.64206	8.31809	49.3261	33.2993	0.1463	0.5365
1	4987	6.98461	6.8026	33.3318	26.6543	0.0983	0.3625
1	4981	8.19182	7.67788	42.4665	31.259	0.1183	0.4489
1	4990	9.57152	9.3125	65.638	37.8495	0.1954	0.6803
1	4994	9.08209	8.37637	49.8393	33.8275	0.1391	0.5552
1	4982	9.8562	10.1618	68.3648	39.4059	0.2013	0.7092
1	4986	8.43534	8.4524	50.3812	33.932	0.1427	0.5396
1	4967	7.97184	7.65656	42.4764	28.4747	0.1293	0.4696
1	4980	5.10479	6.84013	27.5416	27.0315	0.081	0.303
1	4995	6.42009	7.31116	38.6873	28.0788	0.1281	0.5073
1	4977	8.73893	9.22372	59.2492	34.9725	0.1954	0.7086
1	4991	7.64719	10.552	63.3167	48.0841	0.2003	0.7526
1	4988	10.3873	9.75044	66.5523	46.6691	0.1942	0.7518
1	4978	8.89955	6.59401	33.944	28.6344	0.1102	0.4406
1	4976	10.1898	11.4772	83.7644	47.7751	0.2696	0.9509
1	4987	9.61822	11.0753	61.7679	49.6743	0.2111	0.7416
1	4987	7.14875	7.6415	41.0566	29.7002	0.1235	0.4826
1	4990	9.32252	9.87643	64.8346	38.4064	0.2102	0.7228
1	4990	7.33959	8.33868	49.8761	33.4852	0.1507	0.533
1	4994	8.31997	9.09774	56.2705	36.3761	0.1702	0.612
1	4989	7.25003	8.61315	42.8467	38.5849	0.133	0.4826
1	4990	8.0411	11.2964	80.9144	52.4239	0.2684	1.0088
1	4986	9.84636	10.3661	69.1201	38.3647	0.2211	0.7516
1	4965	9.50173	8.76313	55.7527	34.6849	0.1697	0.6195
1	4985	8.73905	9.21833	41.6412	32.5777	0.1412	0.5178
1	4981	8.70351	9.10191	55.36	34.8657	0.163	0.5913
1	4990	8.69834	8.39522	48.7641	34.4199	0.1932	0.5326
1	4990	7.86797	10.1034	60.0042	34.3198	0.205	0.7448
1	4975	7.46482	6.47449	30.8759	25.8874	0.1197	0.3834
1	4988	10.2881	8.38527	54.9442	34.8567	0.1602	0.637
1	4994	9.79724	10.5625	68.7863	40.9892	0.2063	0.7761
1	4988	8.94014	9.71294	54.1715	34.6987	0.1734	0.6139
1	4988	8.81109	9.90602	64.7958	41.7386	0.2195	0.7262
1	4994	8.86776	10.3906	53.3415	47.0451	0.2437	0.8285
1	4607	6.15567	5.5136	22.6784	21.167	0.0683	0.258
1	4986	10.1356	11.3662	76.6746	45.4656	0.2132	0.7779
1	4987	6.44755	7.35513	33.0713	29.6551	0.1012	0.3411
1	4993	9.8522	11.1642	89.6244	46.3919	0.3655	1.1261
1	4996	9.57329	10.3212	67.7854	38.7577	0.2796	0.914
1	4987	8.36142	7.36966	42.4226	28.7021	0.1359	0.5428
1	4989	7.18061	10.261	68.4184	39.4403	0.2113	0.7626
1	4992	9.11071	8.61364	51.4642	30.9729	0.154	0.5257
1	4992	10.1689	10.7905	68.6928	43.6008	0.2625	0.8634
1	4995	8.28966	9.36441	57.8999	42.203	0.2083	0.6967
1	4988	9.17616	8.15021	49.0312	32.9707	0.1557	0.5455
1	4979	10.0544	8.80546	59.0647	32.3482	0.3107	0.9569
1	4972	9.74202	7.88915	42.3288	32.6613	0.1284	0.516
1	4991	9.10191	8.6171	54.7655	33.9706	0.1672	0.634
1	4974	8.52762	8.04437	49.9413	31.8591	0.1563	0.5728
1	4986	7.40454	7.09919	36.2784	28.1296	0.1118	0.4052
1	4987	8.1996	7.31694	40.1776	28.9541	0.1204	0.4341
1	4890	9.69858	10.5526	78.6808	38.1553	0.3848	1.1876
1	4985	5.94121	7.52848	34.181	28.7126	0.105	0.4135
1	4980	9.70052	8.09571	53.6367	35.7848	0.2377	0.839
1	4984	9.0153	9.65473	53.355	37.6257	0.218	0.7782
1	4981	9.93286	9.10933	65.8415	34.8517	0.3248	1.0315
1	4964	6.97969	8.15791	50.8634	31.483	0.1524	0.5732
1	4990	8.41111	8.07555	48.4625	31.3707	0.1621	0.5831
1	4986	6.93862	8.43483	40.9202	33.2838	0.1622	0.5444
1	4990	8.57415	8.27883	48.8227	30.6614	0.1516	0.5507
1	4991	7.68158	8.17177	49.8615	32.9291	0.195	0.6483
1	4985	8.10916	8.4795	56.2691	30.081	0.2999	0.8425
1	4986	11.5153	11.528	84.4738	45.5667	0.3627	1.2653
1	4973	7.29158	7.79586	40.3952	27.9426	0.13	0.4522
1	4989	6.98	7.88313	34.9491	31.3638	0.1255	0.4098
1	4982	9.90699	8.07141	56.0808	31.0488	0.2998	0.9156
1	4971	9.04733	9.39703	50.4331	39.2796	0.1774	0.6613
1	4991	10.8743	10.7453	80.5955	44.8302	0.3226	1.1265
1	4992	7.0644	9.13847	51.9005	34.7148	0.2027	0.6112
1	4677	7.58392	9.12124	50.5676	34.1791	0.1868	0.6048
1	4986	7.85719	9.22051	55.6379	39.1528	0.2157	0.6668
1	4995	7.56683	8.77561	56.07	35.4236	0.2294	0.7314
1	4984	9.22675	11.272	76.8213	50.6503	0.3043	0.9388
1	4969	8.29273	8.65636	57.7292	33.9408	0.115	0.401
1	4995	9.75038	11.1917	71.6715	42.4354	0.2229	0.8489
1	4987	10.0397	11.981	72.6282	50.1127	0.2403	0.8619
1	4966	9.85079	9.34237	64.3748	35.3922	0.2144	0.842
1	4990	8.46558	9.13369	47.39	37.7037	0.1698	0.6308
1	4985	7.11414	9.16546	39.5796	34.6527	0.1306	0.4327
1	4991	7.69947	8.67765	37.7716	34.0662	0.1341	0.4499
1	4594	6.71044	7.6675	32.4246	29.8083	0.094	0.3361
1	4979	6.49623	8.7222	53.782	37.3444	0.1908	0.6476
1	4900	8.00022	10.0887	60.0205	44.2935	0.1858	0.686
1	4995	9.88379	11.2747	70.3693	46.8813	0.276	0.9526
1	4993	9.1912	9.87488	66.6249	41.1532	0.1963	0.7706
1	4971	8.41278	8.92565	49.8597	36.8419	0.183	0.6705
1	4980	8.70601	8.82689	51.5609	34.1478	0.1673	0.5932
1	4982	8.58075	8.6106	57.1116	32.1834	0.1825	0.697
1	4986	6.94293	7.69674	31.5374	29.9507	0.1028	0.3657
1	4982	10.7265	10.8126	66.3761	44.7228	0.187	0.8185
1	5003	8.93113	8.65897	55.8046	41.2046	0.1497	0.6487
1	4951	8.85611	9.69628	53.2627	38.457	0.2007	0.6931
1	4989	9.0599	8.56978	48.0359	35.1485	0.1602	0.5876
1	4995	8.4209	7.50156	38.4723	28.5326	0.121	0.44
1	4986	8.03147	8.03449	40.8203	30.8354	0.1301	0.461
1	4989	7.25057	8.89949	44.2091	35.4068	0.1584	0.5799
1	4986	8.98049	10.7492	67.2031	42.5422	0.272	0.9471
1	4985	7.37366	9.97327	74.4549	47.1528	0.309	0.9587
1	4991	10.1957	9.47557	64.3836	38.6992	0.2421	0.8441
1	4888	9.37391	10.3613	61.6584	41.6289	0.2282	0.7944
1	4991	7.84238	8.40411	44.193	32.7983	0.1478	0.5112
1	4990	8.12812	8.63124	50.0653	34.3281	0.1746	0.6073
1	4991	10.5555	11.1583	71.3166	40.5348	0.2784	0.9799
1	4990	10.9693	11.285	81.7092	47.521	0.3328	1.1993
1	4969	7.93189	8.12037	43.2829	33.2408	0.1448	0.557
1	4987	8.67986	9.10341	57.4507	39.6972	0.2134	0.7708
1	4992	9.42319	10.2649	61.1301	39.9459	0.2549	0.896
1	4985	6.23575	8.02071	32.9939	29.2012	0.1294	0.4373
1	4987	10.1161	10.9723	81.7882	45.2763	0.3299	1.1383
1	4981	9.31276	9.78527	53.111	36.7024	0.1907	0.7108
1	4991	9.43606	10.719	67.1958	44.3465	0.2556	0.8745
1	4987	9.93708	10.5155	74.8327	42.7578	0.2926	0.9949
1	4992	9.28208	10.5215	63.4346	42.5472	0.2033	0.8375
1	4734	5.33022	5.65829	18.4744	21.807	0.0535	0.216
1	4988	8.8417	9.32731	59.0568	38.769	0.2042	0.6902
1	4986	6.3705	9.27442	54.2524	39.6852	0.2255	0.667
1	4988	9.20352	9.39157	53.8905	37.9895	0.2043	0.6815
1	4986	11.0159	9.21556	62.5769	35.9848	0.184	0.7505
1	4991	9.1283	8.49973	50.5516	36.0568	0.1776	0.6375
1	4995	9.23964	8.74748	58.3746	33.38	0.2824	0.8686
1	4997	10.1528	9.52293	56.9475	35.6828	0.1927	0.6869
1	4992	9.52628	11.649	72.7448	48.6427	0.248	0.869
1	4979	8.1754	6.90043	35.6156	27.0225	0.0998	0.3852
1	4991	9.39376	9.51904	58.9217	44.4017	0.2169	0.744
1	4985	5.55445	9.06829	52.3301	36.7038	0.1623	0.587
1	4985	5.72124	6.58432	28.4062	27.2618	0.0827	0.2938
1	4982	9.79848	8.87982	64.8833	35.9261	0.2009	0.7811
1	4989	8.43952	7.55647	40.3861	30.6943	0.1117	0.4228
1	4994	10.5187	8.67233	54.1443	34.3196	0.1587	0.663
1	4994	8.89015	11.2536	83.0946	57.9207	0.3216	1.1386
1	4986	9.02387	10.5433	70.4157	47.0981	0.2366	0.8652
1	4985	7.42682	9.29096	68.3185	37.2108	0.2379	0.878
1	4981	7.84342	7.45277	44.9557	29.8308	0.1446	0.5345
1	4987	10.2541	8.38698	50.7236	33.2641	0.1594	0.6101
1	4984	9.07151	8.27322	49.8653	30.6415	0.1515	0.5779
1	4984	8.46891	8.78003	50.7389	35.3954	0.1542	0.5486
1	4977	6.32046	8.91619	53.8254	31.6239	0.1821	0.7032
1	4969	8.24585	6.78678	34.3603	24.4823	0.1149	0.4354
1	4991	6.31587	8.37461	45.4688	31.0994	0.1295	0.4769
1	4978	9.93136	9.56379	65.5942	36.2874	0.2096	0.8213
1	4989	6.6332	6.94405	33.0955	25.8631	0.0979	0.3925
1	4978	8.27443	7.37169	35.9633	27.3646	0.1116	0.4155
1	4985	7.67871	6.84487	36.8119	27.7841	0.1199	0.4686
1	4975	5.37897	7.12815	36.2735	26.2375	0.1212	0.4725
1	4985	8.83295	8.56335	62.2761	35.6935	0.2124	0.8062
1	4971	7.65388	6.45534	31.9712	26.0145	0.0945	0.3952
1	4983	9.59452	9.39224	56.9011	33.984	0.1899	0.7301
1	4983	6.78498	8.03884	50.1653	30.9609	0.1599	0.5997
1	4987	7.8008	10.2487	72.3321	40.082	0.2212	0.859
1	4983	9.37644	8.52062	53.4588	35.7015	0.1644	0.5881
1	4981	8.61837	7.37108	40.0316	28.2767	0.11	0.4514
1	4995	11.2402	11.7435	95.8733	51.381	0.2634	1.0998
1	4992	9.68403	8.84887	47.938	34.8132	0.1544	0.5714
1	4989	10.0988	10.6141	58.0169	42.7198	0.2197	0.7796
1	4986	8.82629	8.12439	51.4965	35.3069	0.1626	0.5556
1	4983	9.1324	8.16349	49.2224	30.0462	0.1691	0.6058
1	4983	7.46509	8.89714	42.18	36.2998	0.116	0.428
1	4992	8.1791	8.11714	42.9046	31.1974	0.1225	0.4779
1	4986	6.85893	7.64535	37.892	33.8351	0.1056	0.4122
1	4984	9.19383	8.301	50.0025	32.662	0.1564	0.6125
1	4812	11.5207	11.4841	86.7796	48.8969	0.2432	1.0202
1	4986	8.47185	8.03419	42.5935	36.5802	0.11	0.4721
1	4967	7.72354	8.22793	48.4471	39.6765	0.1488	0.5715
1	4981	7.48368	7.40905	39.5267	26.5216	0.1186	0.4592
1	4980	8.3797	8.54425	61.3981	37.2995	0.199	0.7359
1	4977	7.59994	10.2457	68.8909	41.8203	0.2124	0.7568
1	4981	10.1549	8.91683	60.3962	37.8814	0.1815	0.6589
1	4971	10.0645	10.7958	80.1083	42.2925	0.2528	0.9173
1	4985	11.4891	11.7006	93.8325	45.4154	0.2918	1.0393
1	4984	7.08829	7.98143	35.5598	32.5847	0.1226	0.3914
1	4448	9.10643	10.1561	71.416	41.0796	0.2192	0.776
1	4987	8.96889	8.57947	54.9108	32.9883	0.1829	0.698
1	4967	6.96133	6.76163	24.2521	24.9071	0.0697	0.27
1	4977	8.38097	7.379	40.3512	27.7034	0.1172	0.456
1	4982	7.38591	5.79496	25.4517	24.2702	0.08	0.3181
1	4979	9.75309	9.11683	50.3745	35.3368	0.1596	0.5999
1	4987	8.56524	10.332	74.2129	42.1564	0.221	0.7815
1	4987	8.52011	10.3043	63.8875	45.3586	0.2381	0.8436
1	4988	7.25205	8.35317	40.5649	34.4172	0.1106	0.4031
1	4987	8.76864	8.58956	51.6796	34.1666	0.1476	0.5578
1	4847	9.64598	9.23217	55.5506	40.1181	0.195	0.6973
1	4983	8.28415	8.74934	54.9491	30.9501	0.1843	0.6739
1	4993	10.1805	11.7154	86.2058	51.8632	0.3178	1.0452
1	4976	6.72271	8.39976	48.0702	37.6105	0.1452	0.52
1	4986	8.58096	8.20017	46.4668	32.2961	0.1789	0.5605
1	4993	6.97208	9.28717	46.4239	36.856	0.1379	0.4643
1	4990	5.7575	7.20011	28.5309	28.7651	0.0778	0.2896
1	4966	4.56478	7.33529	32.3551	28.9197	0.0912	0.3387
1	4984	7.8212	9.13552	45.7867	37.2382	0.1379	0.5128
1	4983	4.41924	6.95516	32.1478	29.7813	0.0882	0.3221
1	4983	7.7951	7.39268	37.9767	29.2393	0.1201	0.4366
1	4996	9.89764	11.1076	67.0206	40.7159	0.1819	0.6925
1	4991	7.60733	8.57164	39.4458	35.1382	0.1109	0.4343
1	4985	8.86037	9.54833	64.1627	37.8495	0.2053	0.7215
1	4979	5.44918	7.85488	40.242	31.452	0.1279	0.4518
1	4990	7.75304	9.24285	46.0569	34.0928	0.1457	0.5277
1	4992	9.49134	9.4724	57.5441	37.4005	0.188	0.7004
1	4989	8.41043	10.452	63.9182	44.3368	0.2079	0.7442
1	4988	9.26809	9.55496	63.4327	38.3924	0.2018	0.7188
1	4986	7.43291	8.05611	31.4086	28.7824	0.1154	0.4128
1	4985	8.82158	7.80565	40.6933	30.2223	0.1318	0.4631
1	4992	6.17569	8.31612	35.583	36.0475	0.1083	0.3988
1	4994	8.91618	9.33765	64.8011	42.0982	0.2371	0.8058
1	4997	10.3871	11.0176	69.9889	51.8974	0.2526	0.8981
1	4994	10.4105	10.6901	72.7091	56.984	0.2483	0.9037
1	4992	6.93037	8.07042	38.8623	34.9278	0.1375	0.4643
1	4976	6.08431	7.79831	28.5796	31.0256	0.0958	0.3722
1	4987	8.63514	8.00514	54.2368	29.5209	0.269	0.8102
1	4989	9.4486	11.9959	61.8197	46.4818	0.2338	0.8529
1	4995	7.34128	10.7852	55.3724	45.8374	0.1748	0.6402
1	4981	8.67516	7.49037	43.5746	29.8027	0.1329	0.5064
1	4990	8.86279	9.50561	49.7283	43.944	0.1912	0.6696
1	4967	8.27613	6.58621	36.015	26.7535	0.1088	0.3986
1	4989	9.45444	11.1179	65.9983	46.161	0.2243	0.7901
1	4991	8.82941	9.13052	66.614	32.4582	0.3453	1.0276
1	4989	9.14911	10.9832	73.4891	42.0677	0.2316	0.8205
1	4994	8.19567	10.164	63.1214	43.4779	0.1834	0.6476
1	4993	10.2728	10.9611	80.6298	43.5697	0.2528	0.8798
1	4985	7.5833	8.87803	46.0661	36.6085	0.1402	0.4977
1	4984	8.9542	8.70743	45.6528	33.6061	0.1706	0.5332
1	4991	10.5375	10.7526	63.4634	39.3439	0.2004	0.7643
1	4982	7.84014	10.6538	69.4462	39.2528	0.2174	0.8632
1	4972	7.31645	6.39741	27.6591	24.2503	0.0779	0.3101
1	4040	5.30918	4.62685	17.0149	18.6902	0.0477	0.1958
1	4966	6.17857	7.6103	40.4252	28.6415	0.1189	0.4609
1	4991	10.0296	8.11719	49.8247	33.8503	0.1569	0.6248
1	4986	9.37739	8.42008	44.2249	30.599	0.1401	0.5502
1	4995	9.14233	8.65842	51.5551	35.6221	0.1587	0.5557
1	4981	7.08933	7.38942	37.2941	28.3903	0.1216	0.4536
1	4979	6.84611	9.19416	39.5387	35.8848	0.122	0.441
1	4990	9.17203	7.70203	44.5512	30.1423	0.1273	0.5058
1	4627	6.15785	5.84093	24.7752	21.9308	0.0685	0.2781
1	4986	8.05469	9.17406	44.1864	41.9541	0.1618	0.5724
1	4984	9.56468	9.54951	59.2677	36.1282	0.1751	0.6837
1	4987	9.28086	9.84427	70.0206	39.7878	0.2181	0.7935
1	4982	8.67669	8.7253	55.476	35.6925	0.1786	0.639
1	4986	8.009	8.86765	58.6991	37.1469	0.1725	0.633
1	4383	5.31959	5.1769	19.8971	19.8595	0.0558	0.2162
1	4987	9.2835	9.37569	51.7455	36.471	0.1742	0.5863
1	4990	6.64701	9.59364	58.4341	36.4263	0.1848	0.6558
1	4986	10.5447	9.88553	62.9686	40.6745	0.2013	0.7401
1	4992	10.3779	9.81041	58.574	39.2813	0.1756	0.6723
1	4990	9.25953	8.15459	45.8801	32.8404	0.141	0.5151
1	4989	9.68255	9.92432	67.9538	39.5538	0.224	0.8101
1	4991	8.25504	8.66394	44.8985	37.8139	0.15	0.5009
1	4979	6.55758	6.60945	28.6578	24.42	0.0826	0.3127
1	4993	7.68479	9.06172	52.6725	32.3047	0.1618	0.6523
1	4987	8.8284	8.22112	51.4625	31.4382	0.2043	0.6598
1	4994	8.75935	8.88026	55.8108	33.2788	0.2088	0.7206
1	4993	6.95876	10.3311	49.3727	41.2196	0.1616	0.5503
1	4984	6.98958	7.88663	42.0313	34.566	0.1564	0.4436
1	4992	8.18477	10.2155	50.9403	46.8986	0.1765	0.6857
1	4967	8.56584	8.36117	45.7132	41.9035	0.144	0.5249
1	4995	10.558	10.1503	68.7294	42.0242	0.2822	1.0209
1	4987	6.37103	7.82053	40.2052	35.5114	0.1176	0.4443
1	4977	9.31883	8.64843	47.8526	33.903	0.1358	0.5092
1	4992	7.2633	9.02	46.616	40.3271	0.1494	0.5729
1	4978	7.84447	8.45996	39.346	35.8621	0.1242	0.4683
1	4935	6.39459	7.21091	29.9689	28.5548	0.0829	0.3104
1	4983	6.3553	7.1296	30.1919	29.1578	0.0811	0.3015
1	4987	7.35152	9.08536	53.3599	33.4092	0.1743	0.5636
1	4993	10.3699	12.804	94.4067	52.5098	0.2937	1.2077
1	4987	8.15309	11.606	92.46	48.5969	0.387	1.2502
1	4986	8.46525	9.04315	57.0496	40.3002	0.2313	0.8006
1	4987	9.43397	9.59354	66.2972	41.0988	0.2647	0.8567
1	4990	9.8872	11.0007	72.0571	45.4902	0.2731	0.9539
1	4979	9.20371	8.94189	61.3743	32.2962	0.3016	0.9384
1	4981	7.2283	7.18794	37.6935	31.072	0.1232	0.4259
1	4988	9.4987	10.7359	67.2528	46.2317	0.2417	0.8786
1	4982	9.61916	7.9571	51.434	32.6576	0.2119	0.7733
1	4991	8.63523	9.18591	57.1198	33.6457	0.1795	0.6594
1	4984	8.03049	8.80121	57.6564	39.3866	0.2034	0.768
1	4983	7.25593	8.56762	40.5403	33.146	0.1471	0.4962
1	4991	7.97353	8.99423	57.5665	36.745	0.1767	0.6807
1	4992	6.93304	9.31242	36.8872	36.4579	0.1073	0.3971
1	4984	9.17037	8.27879	45.8861	31.8161	0.1359	0.5049
1	4986	9.29432	10.3148	59.323	42.7339	0.2363	0.8323
1	4991	9.61608	9.78008	75.3388	44.5619	0.3137	0.993
1	4986	9.53149	10.1609	67.9976	45.5458	0.2559	0.8576
1	4972	8.65537	9.74167	68.2909	33.8194	0.3403	1.0462
1	4985	8.97103	7.9599	54.6556	30.1816	0.3152	0.9241
1	4992	9.37092	7.79997	48.9322	30.7165	0.2215	0.7217
1	4987	8.86568	7.46611	46.6473	29.8775	0.1488	0.5441
1	4993	7.08761	8.26681	52.8519	31.9339	0.1808	0.6217
1	4991	9.01369	8.60856	46.0482	35.0659	0.1721	0.569
1	4964	7.81719	7.35098	39.2192	28.8015	0.1215	0.4735
1	5000	10.0213	11.3727	76.817	54.4682	0.2799	1.1483
1	4981	8.81644	8.68179	52.6573	36.4839	0.2071	0.7486
1	4989	10.1462	8.70794	56.9262	37.8979	0.234	0.8452
1	4977	8.55717	7.86117	35.7833	30.0622	0.1123	0.4163
1	4988	6.54194	7.61464	32.6937	26.7133	0.0981	0.3887
1	4984	9.28747	8.27531	44.91	29.9594	0.1301	0.492
1	4945	8.93996	8.35632	50.085	31.4743	0.1365	0.544
1	4988	7.33867	8.01859	45.9055	36.7153	0.1402	0.5136
1	4988	6.95564	9.61337	49.544	32.3785	0.1628	0.5758
1	4982	9.01562	9.79767	59.0213	46.5005	0.2048	0.6899
1	4974	8.20926	8.54355	48.8168	34.6541	0.1522	0.5497
1	4992	9.86019	8.23395	47.1312	31.6059	0.1488	0.5699
1	4990	9.49612	9.6021	62.0672	44.3449	0.2575	0.8822
1	4992	5.82252	11.4838	73.6854	47.1365	0.296	0.93
1	4984	8.17438	7.29163	42.5862	29.6031	0.1245	0.4801
1	4981	7.65251	7.82354	43.1196	35.2585	0.1272	0.4468
1	4985	6.85134	7.89059	36.0905	32.1586	0.0959	0.3504
1	4995	10.374	11.2952	82.7269	50.9747	0.3083	0.9877
1	4991	7.94952	9.47556	50.9525	39.8897	0.1649	0.4876
1	4990	7.56971	8.18064	36.7946	34.2968	0.1374	0.4223
1	4987	8.69495	9.31088	62.3678	42.7021	0.2779	0.8211
1	4979	10.3465	9.52304	64.4457	33.802	0.1971	0.7554
1	4962	8.1248	6.63415	32.2944	25.3872	0.0977	0.3559
1	4993	8.59284	11.3164	63.0157	47.0156	0.2032	0.7246
1	4979	7.49229	6.961	41.6378	29.29	0.1581	0.5474
1	4977	7.50578	6.30989	35.86	24.7668	0.1052	0.406
1	4982	7.99212	9.34509	47.3099	39.939	0.1542	0.5657
1	4985	8.69845	9.93944	55.0495	43.842	0.1776	0.6631
1	4992	8.04216	8.17277	46.255	37.4579	0.1379	0.5152
1	4989	6.98991	9.64137	57.0941	45.2003	0.181	0.6789
1	4985	8.01709	8.85769	50.1218	38.2935	0.1745	0.5802
1	4992	9.668	12.8043	92.0081	46.9303	0.3098	1.0724
1	4993	5.23715	9.41607	48.4603	42.0846	0.1728	0.5409
1	4985	6.99649	8.45077	42.0924	37.1909	0.1632	0.5112
1	4993	8.54749	9.47897	57.6394	45.7699	0.191	0.6894
1	4985	8.25567	8.45621	44.778	38.5185	0.1369	0.4989
1	4991	7.03056	7.99714	42.7669	30.6009	0.1304	0.4273
1	4991	4.76489	6.99128	33.9639	30.7851	0.0833	0.3607
1	4989	5.91754	8.99035	51.1602	41.0226	0.151	0.5727
1	4985	7.57581	8.4837	42.6312	35.2462	0.1137	0.4739
1	4973	6.5074	7.7212	36.0588	32.1446	0.1076	0.4014
1	4990	7.81668	7.57814	40.9897	28.0193	0.1252	0.4841
1	4972	8.37543	8.46404	52.0483	31.7793	0.1531	0.6481
1	4987	8.18504	10.1294	57.3152	44.4798	0.1859	0.6726
1	4991	9.13187	12.0091	68.4375	52.9309	0.2603	0.9155
1	4995	8.82274	11.5262	80.5315	54.4776	0.2616	0.9595
1	4978	6.91556	7.53468	35.8113	32.0215	0.1152	0.3815
1	4995	8.53759	9.1781	50.9761	39.462	0.1558	0.4755
1	4987	8.09544	7.15926	41.4184	29.5172	0.1179	0.4225
1	4997	7.05176	9.3101	46.0667	37.7985	0.1356	0.4952
1	4958	5.57426	7.61604	39.8982	33.0106	0.1224	0.4364
1	4984	7.21193	7.36315	39.9757	26.659	0.1386	0.4879
1	4993	5.90721	8.9926	55.9921	42.0503	0.2035	0.625
1	4987	6.76628	10.0489	66.1391	44.5391	0.2142	0.7856
1	4985	7.81628	6.66114	30.9447	25.9824	0.0993	0.3738
1	4987	9.3068	8.72573	58.9966	33.5689	0.1869	0.7258
1	4996	5.84752	10.5023	71.5795	57.2811	0.2494	1.0178
1	4983	6.82328	8.54611	39.4213	36.1905	0.1235	0.4197
1	4983	8.22932	8.89651	55.0517	37.9034	0.2205	0.74
1	4986	5.19074	8.74993	47.3673	37.6921	0.1757	0.5784
1	4987	8.00468	9.58525	51.1339	37.7445	0.1772	0.5621
1	4985	7.60658	8.17592	41.5837	34.7167	0.1673	0.5408
1	4982	8.2172	9.12731	48.3085	36.6981	0.1778	0.5736
1	4983	6.07614	7.99248	48.0471	31.5229	0.1511	0.5873
1	4964	7.67579	7.23334	41.0802	28.9009	0.127	0.4641
1	4986	6.73387	7.96358	37.5755	31.7412	0.1341	0.4311
1	4988	7.64074	10.2505	70.618	39.7972	0.2087	0.781
1	4988	9.58335	8.41266	51.8577	31.4102	0.1662	0.6512
1	4982	9.30576	8.72482	53.9237	36.1255	0.1688	0.5843
1	4992	8.75128	7.8014	44.8119	31.2452	0.1297	0.4962
1	4987	5.48684	8.20043	47.6888	35.2181	0.1741	0.5413
1	4964	9.73458	7.93509	55.2318	31.6974	0.2697	0.832
1	4992	9.8545	12.8276	89.3693	53.4375	0.3794	1.2275
1	4990	10.5852	12.4484	95.5609	53.178	0.3276	1.0683
1	4986	8.75446	8.90611	49.7275	33.6089	0.1588	0.5525
1	4990	8.46198	9.38259	65.8686	41.7738	0.2624	0.8561
1	4981	5.84338	7.26139	26.0677	30.8822	0.0871	0.3194
1	4989	9.65965	9.17998	73.0519	35.6802	0.3571	1.0439
1	4983	9.17555	8.6045	59.0291	31.9169	0.2982	0.8639
1	4986	10.0762	10.8224	72.9418	50.4162	0.2767	0.8705
1	4979	8.79681	7.44545	39.2513	30.3608	0.1249	0.4459
1	4991	10.5186	10.3855	66.9023	39.7979	0.1975	0.7259
1	4981	8.32982	7.40118	41.2893	28.3058	0.1338	0.5378
1	4968	8.0757	8.39203	41.1618	30.7689	0.1273	0.4908
1	4987	7.24352	8.06318	44.6838	35.7799	0.1292	0.4752
1	4981	7.26	6.66224	31.2899	24.9266	0.093	0.3436
1	4987	8.25396	7.64336	49.8897	32.1817	0.1629	0.6215
1	4993	10.0897	10.22	75.7922	41.9743	0.2354	0.8051
1	4991	9.30945	8.50085	49.3421	32.7431	0.1546	0.5691
1	4981	7.04109	6.68344	32.1602	24.6795	0.1055	0.4132
1	4893	10.1194	10.446	57.9748	38.0274	0.1805	0.6943
1	4975	7.08608	8.41753	36.0206	33.7529	0.1068	0.3956
1	4990	10.5329	10.9067	79.9268	46.9252	0.3108	0.9921
1	4977	8.41188	8.54369	62.2012	32.0951	0.3063	0.9945
1	4991	7.78136	9.91039	47.4117	37.4658	0.1393	0.5387
1	4992	8.83988	11.8283	81.3937	53.5718	0.3104	0.9854
1	4988	7.02011	8.40982	56.2682	30.5161	0.2939	0.8703
1	4996	7.95257	8.75541	56.9968	43.2149	0.2553	0.8005
1	4994	8.50694	10.0699	51.3389	37.0368	0.1908	0.6592
1	4988	8.36023	8.15161	54.4773	38.4029	0.2109	0.705
1	4987	10.2426	8.71879	57.1722	32.2317	0.1831	0.6994
1	4992	8.30182	9.87567	62.858	42.7243	0.2223	0.7402
1	4991	6.50276	7.96248	46.5312	29.368	0.1458	0.5493
1	4988	6.85041	8.71591	39.0651	36.9845	0.1207	0.4389
1	4988	8.24695	9.17988	57.4713	41.6803	0.219	0.6834
1	4990	8.32566	7.5802	39.4831	27.5581	0.1213	0.4444
1	4989	6.05096	7.1938	28.2418	29.3538	0.0947	0.3166
1	4984	7.82356	8.99885	63.994	32.405	0.3516	1.006
1	4978	8.5472	6.78743	40.1916	26.2191	0.1233	0.4534
1	4984	8.03915	7.50361	36.3497	28.9661	0.1137	0.4156
1	4989	9.10078	9.50872	58.6679	40.7741	0.2421	0.7702
1	4995	8.62642	7.61809	48.487	29.6062	0.1607	0.5915
1	4991	10.0301	9.0904	56.4015	32.3151	0.2905	0.9047
1	4988	9.3	9.7862	66.0201	37.8202	0.1878	0.7543
1	4990	9.66388	10.6134	76.9471	44.5266	0.2205	0.8966
1	4984	11.0693	8.02863	62.5025	30.7208	0.3395	1.0145
1	4987	7.49514	9.10015	63.8224	38.9323	0.1831	0.7256
1	4983	9.99059	10.1813	67.8158	41.2194	0.2034	0.8231
1	4985	7.98548	9.15475	46.0138	39.9999	0.1564	0.5609
1	4992	9.50742	10.8397	63.2687	41.8553	0.2002	0.7449
1	4986	7.33141	7.13291	28.5994	24.2124	0.0854	0.3231
1	4990	6.55937	7.95014	34.1584	33.1173	0.1015	0.3527
1	4992	7.3558	9.63583	50.2745	39.8997	0.1987	0.7242
1	4982	11.0363	8.74681	70.431	33.4697	0.3312	1.0172
1	4988	5.98437	6.98124	26.223	28.87	0.0881	0.3195
1	4424	6.01311	5.31815	20.7682	20.7982	0.0615	0.2397
1	4991	7.01448	8.41524	40.142	34.0422	0.1218	0.4288
1	4983	8.77735	7.89677	45.4013	28.6442	0.1394	0.5479
1	4991	8.87458	8.56448	47.1143	37.8191	0.1896	0.6756
1	4978	6.83857	7.62787	35.5334	32.1594	0.1013	0.3578
1	4985	8.2165	8.47318	57.0132	30.9552	0.3043	0.8533
1	4993	8.59901	8.30495	46.9794	33.3278	0.1343	0.5017
1	4984	7.51725	8.7789	41.8317	37.4082	0.1345	0.4757
1	4978	6.76556	7.93348	37.2051	30.9932	0.1146	0.3831
1	4981	10.1123	9.02214	66.5329	37.1935	0.2114	0.7373
1	4982	9.50034	8.69637	47.0158	35.0593	0.1506	0.5951
1	4994	8.7617	11.4893	76.133	48.7332	0.2496	0.9112
1	4993	8.92442	9.53993	72.487	38.4871	0.2262	0.8726
1	4985	6.72905	9.34213	52.8159	34.4888	0.1747	0.6033
1	4986	11.0959	8.74501	66.7102	31.7654	0.3125	0.9945
1	4985	9.83553	9.62023	60.296	38.8266	0.1865	0.6595
1	4988	7.84681	9.73839	57.2332	39.9549	0.2173	0.648
1	4990	9.51486	8.78385	56.8279	31.4253	0.1746	0.6727
1	4985	6.20158	7.50833	41.9598	29.0048	0.1362	0.489
1	4989	7.26521	9.71064	43.4086	37.0693	0.1548	0.4702
1	4988	7.67702	8.0305	40.5862	37.2707	0.1247	0.4398
1	4986	7.91501	7.64791	35.6491	29.4126	0.1365	0.459
1	4988	8.04346	7.56349	37.4696	30.2582	0.1357	0.4744
1	4984	9.83433	8.69892	65.9184	37.287	0.2957	0.8938
1	4986	6.68758	8.02373	37.08	33.8785	0.1198	0.3897
2	4988	11.8232	10.7671	78.2179	40.1534	0.2764	0.851
2	4976	12.9706	10.6116	97.0246	43.0894	0.3982	1.2903
2	4988	14.5774	16.6477	152.659	62.3792	0.6392	2.0009
2	4987	10.1496	9.38319	59.7816	37.8832	0.1977	0.6632
2	4998	20.264	20.8916	304.459	80.984	1.1267	4.0306
2	4984	8.54391	11.0619	66.2952	43.1146	0.1769	0.6502
2	4978	7.33698	6.67509	33.1828	27.4493	0.146	0.4895
2	4994	10.6828	10.8393	57.8975	39.1712	0.1527	0.5585
2	4975	8.10847	7.3236	33.3588	27.3299	0.0931	0.3161
2	4988	11.3821	15.6559	142.623	55.5054	0.5128	1.6712
2	4984	13.7996	14.3496	148.945	55.718	0.4883	1.5962
2	4989	11.003	12.7094	119.824	51.1972	0.3307	1.3412
2	4994	14.7799	21.7468	249.783	79.4378	0.7236	2.8725
2	4988	8.58653	9.40148	64.1579	33.8038	0.183	0.7067
2	4973	8.77679	8.6662	54.6113	37.4646	0.1699	0.6834
2	4990	11.0778	12.256	110.214	45.3705	0.428	1.305
2	3501	17.3347	14.4384	187.382	77.8624	0.7473	2.6154
2	4993	12.1428	10.7455	74.1544	42.7273	0.2624	0.8365
2	4993	16.9002	24.0963	327.754	84.3048	1.0325	3.3682
2	4991	17.0563	22.7075	310.451	88.7966	1.1918	3.5894
2	4973	14.0555	12.2213	104.654	45.9938	0.3836	1.2384
2	4987	10.5924	9.19829	58.5178	37.5417	0.1628	0.5676
2	4990	11.5183	10.7988	75.2835	39.6969	0.2178	0.7414
2	4987	10.6285	10.8511	69.4272	43.6181	0.2079	0.7331
2	4991	10.4515	11.8807	102.52	43.2463	0.289	1.1328
2	4974	8.69066	7.2805	43.2212	30.5952	0.1136	0.3817
2	4913	5.75226	6.05344	21.0077	22.849	0.0616	0.2129
2	4987	7.74192	10.0635	69.7598	38.9167	0.2688	0.9287
2	4991	11.737	10.4425	86.1228	45.816	0.372	1.1845
2	4992	14.9947	21.0687	276.905	75.0803	1.1625	3.6364
2	4990	11.8286	16.9058	167.036	57.023	0.6381	2.0704
2	4990	11.7234	14.6344	148.252	55.1723	0.6311	1.8289
2	4996	17.9659	19.1957	240.722	70.9811	1.123	2.9166
2	4987	9.43107	12.0918	87.0971	47.5393	0.2127	0.7288
2	4989	10.1977	10.0444	57.5707	39.5891	0.154	0.553
2	4988	11.6677	14.1447	143.346	52.5537	0.6597	1.9609
2	4991	9.59611	12.6668	100.636	43.7299	0.4199	1.3338
2	4993	12.3521	17.4216	183.845	63.0064	0.6527	2.0887
2	4981	12.5461	17.2855	213.104	71.9161	0.6764	2.2308
2	4993	14.6683	15.5174	151.6	62.2336	0.5547	2.0133
2	4991	18.2093	18.7205	238.96	76.5941	0.923	3.2128
2	4990	14.5547	14.4323	137.205	52.8688	0.4332	1.4838
2	4986	7.32224	8.53626	36.9175	31.6984	0.1065	0.383
2	4974	6.86143	9.16884	52.5708	34.7519	0.1811	0.5684
2	4991	8.65122	8.41612	41.3891	33.6447	0.1231	0.4058
2	4982	4.37662	6.59208	30.6422	29.3138	0.086	0.3154
2	4987	10.0406	11.2918	80.5564	43.4243	0.2455	0.8006
2	4982	10.4179	9.16107	48.1713	33.4055	0.129	0.4121
2	4991	15.0465	17.4251	197.55	69.1578	0.6832	2.2037
2	4990	14.0396	14.223	143.406	53.9296	0.4745	1.6149
2	4991	10.0516	9.54935	62.7084	40.2321	0.2339	0.7449
2	4996	11.4674	13.043	98.9559	49.5307	0.3116	1.0367
2	4979	8.39039	7.18885	40.1489	28.5487	0.116	0.4382
2	4990	8.92558	15.5588	130.693	61.2139	0.4359	1.4043
2	4990	14.7071	19.6688	236.527	77.0197	0.7135	2.5744
2	4991	14.4198	20.1531	264.938	78.9401	0.8566	3.028
2	4996	15.0636	21.6794	285.444	84.1251	0.9999	3.2701
2	4998	20.9504	21.0455	323.289	87.8699	1.0439	3.6181
2	4996	18.6895	20.0134	280.725	84.1584	1.289	3.4692
2	5000	14.107	18.485	218.471	63.9834	1.0053	2.9084
2	4983	8.19704	8.20615	37.7696	31.6353	0.107	0.3625
2	4987	14.3035	19.9129	257.262	73.5223	1.2487	3.5213
2	4987	7.49234	10.1734	60.1847	33.8231	0.172	0.6551
2	4991	14.6719	18.5755	235.531	67.6756	1.0129	3.1536
2	3245	13.4158	17.8981	203.866	67.0773	0.75	2.3913
2	2530	12.2686	18.4997	196.666	69.3409	0.6915	2.3371
2	4998	19.6921	21.7213	290.823	82.8627	0.961	3.2092
2	4996	14.3401	19.6989	225.785	72.5981	0.767	2.6175
2	4991	15.2257	15.9205	180.216	65.0139	0.543	2.2008
2	4993	14.1396	19.5288	237.362	72.0499	1.153	2.7384
2	4984	9.94922	9.96139	65.155	34.3862	0.1816	0.6997
2	4982	4.56497	6.71804	26.1172	25.3019	0.076	0.2605
2	4986	4.07197	6.82988	23.0866	23.0565	0.0718	0.2326
2	4954	6.2892	6.22325	25.0875	26.6484	0.0855	0.272
2	4985	7.47248	7.71555	35.7038	31.6568	0.1076	0.3934
2	4981	6.27192	6.90605	29.6083	29.65	0.0957	0.342
2	4987	11.4074	11.4196	80.9647	44.3279	0.313	0.8731
2	4989	10.4521	12.2553	104.049	45.2333	0.3872	1.1779
2	4998	24.9056	26.0239	456.733	102.959	2.0381	5.7579
2	4987	12.6832	13.1442	119.079	55.4737	0.4157	1.489
2	4989	15.1641	23.2692	310.159	88.4912	1.0623	3.7337
2	5004	15.9741	22.6053	301.296	82.5853	1.335	3.8513
2	4996	14.9873	20.5732	273.554	80.7666	1.1451	3.4875
2	4994	19.5732	22.3652	309.162	85.4939	1.2099	3.9403
2	4993	14.7902	24.176	326.361	90.7604	1.4008	4.5271
2	4998	16.9178	23.3443	352.844	90.1928	1.3802	4.484
2	4998	15.0845	22.3763	294.198	80.7791	1.1205	3.6185
2	2419	23.4407	23.4944	423.996	102.405	1.638	5.2786
2	4995	13.9541	19.7947	224.803	73.1471	0.9019	2.9216
2	4995	20.1011	23.8165	332.801	86.9678	1.3294	4.1915
2	4993	14.3397	22.1475	283.988	83.3082	1.143	3.5412
2	4997	19.0224	18.3249	249.501	77.293	1.1273	3.8133
2	4996	8.88642	11.7927	69.0797	45.0059	0.1908	0.636
2	4996	18.3683	27.755	446.908	103.797	1.8837	5.7082
2	4984	7.67652	10.5052	70.9085	42.743	0.2168	0.7547
2	4990	26.0352	24.57	445.883	96.2279	1.883	5.6052
2	4990	14.2706	12.0193	105.152	44.9247	0.4124	1.2928
2	4994	10.4803	12.4079	115.895	49.7525	0.4304	1.3601
2	5020	19.0901	24.3424	413.957	95.81	1.9536	5.758
2	4990	23.4959	23.2758	403.258	97.1335	2.0381	5.4828
2	4991	18.5349	19.8835	253.724	78.5441	1.0585	3.2198
2	4998	18.7667	25.0459	382.233	93.301	1.5088	4.6416
2	4986	8.97932	9.17568	54.5212	35.5302	0.1585	0.6128
2	4993	16.3798	15.1413	185.312	58.597	0.7694	2.5023
2	4993	15.4251	12.8025	132.34	51.0985	0.5447	1.8241
2	4993	14.3566	19.3436	218.278	65.0902	0.9549	3.001
2	4992	8.26199	9.65415	62.0053	38.7897	0.1819	0.6552
2	4994	15.2883	20.5168	262.899	72.6007	1.0669	3.3586
2	4986	6.74277	5.64372	28.3135	24.613	0.1228	0.4005
2	4963	9.1834	9.67522	64.118	42.0123	0.2048	0.678
2	4988	6.98008	6.38171	27.4517	27.9419	0.0774	0.2811
2	4995	6.98297	8.05162	41.4943	31.7724	0.1267	0.3837
2	4990	7.18254	8.94845	48.1141	36.9387	0.1688	0.4929
2	4993	14.3995	18.1935	244.124	78.5137	1.0002	3.1161
2	4976	10.8225	12.1386	96.6134	46.4844	0.3021	1.0572
2	4987	12.3472	11.1084	90.0346	42.4615	0.3188	1.0781
2	4985	11.0083	14.9857	135	51.1398	0.4473	1.6448
2	4991	15.7333	14.9637	151.278	54.6224	0.5517	1.9336
2	4992	9.42889	13.6417	111.317	47.7986	0.619	1.6316
2	4991	9.63638	13.3663	111.264	47.9988	0.5813	1.6216
2	4992	16.2263	16.2874	193.97	63.1264	0.7319	2.2748
2	4985	14.371	13.2431	128.227	48.6307	0.4406	1.4294
2	4986	13.6536	19.5313	258.368	76.2438	1.2226	3.5164
2	4993	11.9669	11.636	96.5935	46.0957	0.4733	1.2881
2	4984	9.66638	13.6415	116.365	49.8785	0.6538	1.7622
2	4983	11.4777	16.3768	154.729	56.6534	0.857	2.3524
2	4987	9.5802	13.0494	102.304	44.9916	0.5935	1.4714
2	4988	6.31767	8.38382	48.4779	35.3772	0.1587	0.5254
2	4987	5.67785	10.0136	48.8745	36.1076	0.2245	0.6216
2	4992	11.2585	9.51199	67.0363	39.2924	0.2254	0.728
2	4984	8.42889	12.4074	96.8397	45.8476	0.5434	1.5071
2	4987	9.24767	12.3124	93.0621	47.5341	0.4318	1.2283
2	4984	9.56461	10.3969	81.2639	39.234	0.2973	0.997
2	4988	7.18957	7.24813	36.6976	30.0764	0.1647	0.4707
2	4979	7.17062	8.16931	36.9552	31.2487	0.1277	0.4126
2	4994	13.3743	19.3253	229.67	72.2554	0.8753	2.7748
2	4989	10.1348	14.9246	133.7	51.5829	0.4543	1.4379
2	4993	23.4781	25.2523	413.543	95.804	1.9908	5.4158
2	4987	9.45916	8.63692	52.0684	34.5646	0.2052	0.6219
2	4992	15.8193	21.4461	292.099	88.4813	1.0129	3.5982
2	4980	7.81894	8.61768	42.3226	33.4338	0.1402	0.4694
2	4980	7.27795	7.54197	38.6755	31.322	0.1545	0.4796
2	4992	16.1216	12.1293	124.839	47.0629	0.4688	1.5106
2	4988	12.0625	10.6186	80.3919	41.4964	0.297	1.0282
2	4973	14.2134	23.0955	301.797	87.7611	1.831	4.4491
2	4987	5.43922	6.09691	20.0079	23.423	0.0718	0.2334
2	4997	20.0238	21.2628	283.556	81.3344	1.1392	3.5545
2	4996	12.8102	20.9718	241.968	79.2934	1.1824	2.5786
2	4974	12.9781	16.2728	176.389	60.2815	0.7959	2.4115
2	4985	10.5207	15.7922	165.174	61.7641	0.8324	2.5046
2	4992	9.60262	13.194	111.593	48.5494	0.4836	1.4808
2	4982	12.9178	13.415	121.791	50.4899	0.6034	1.7586
2	4995	13.0702	14.8372	139.306	54.8958	0.6477	1.9889
2	4988	10.6932	11.3439	77.418	44.3293	0.254	0.9136
2	4991	15.4404	22.4113	316.878	85.0204	1.4729	4.6313
2	4994	9.2348	13.6818	113.779	49.8734	0.4287	1.3297
2	4990	12.2329	13.0136	104.641	52.9414	0.3714	1.204
2	4993	11.9531	14.6896	142.602	52.4071	0.5812	1.728
2	4997	14.2864	19.7707	233.503	72.3105	1.1997	3.6726
2	4982	12.6574	9.00631	72.3844	40.1237	0.2823	0.896
2	4966	11.3177	8.70405	56.9182	34.7807	0.2311	0.736
2	4990	13.5426	14.3846	143.096	56.1401	0.6404	2.0527
2	4993	10.7479	12.0548	105.579	45.2723	0.4982	1.5033
2	4988	13.3168	19.5767	245.451	72.9206	1.3179	3.8351
2	4985	6.29521	8.38731	44.1091	30.3547	0.142	0.4742
2	4970	6.92956	6.54177	33.3364	28.3459	0.1025	0.3991
2	4997	10.1839	10.1492	63.8708	40.559	0.1822	0.761
2	4993	12.3487	14.1938	98.417	56.2298	0.2571	0.9086
2	4985	9.71171	11.1955	65.2614	45.8469	0.1771	0.6076
2	4992	12.7956	17.0015	130.328	68.3311	0.2902	1.112
2	4992	14.5442	18.7574	155.838	72.0345	0.4299	1.5763
2	4995	12.5704	19.6323	211.178	73.328	1.02	3.0223
2	4985	16.7237	21.2442	300.276	83.228	1.8117	5.0903
2	4996	20.0188	24.9622	346.097	92.1392	1.886	5.4302
2	4995	11.4627	15.4243	130.801	69.1352	0.3411	1.265
2	4996	21.2709	26.7817	384.303	96.6554	2.0586	6.1434
2	4987	19.5424	22.0854	321.559	84.677	1.8755	5.2105
2	4990	14.2004	23.2144	302.217	79.556	1.6338	4.9309
2	4991	16.7725	20.7783	237.707	74.2787	1.2058	3.6543
2	4996	13.9367	18.7323	206.841	67.2771	1.2508	3.136
2	4990	16.365	19.0026	243.255	74.5236	1.284	3.7532
2	4986	14.8328	22.0552	298.399	81.1228	1.678	4.8606
2	4997	14.7151	26.0266	314.656	82.994	1.821	5.0933
2	4993	12.81	22.5528	271.068	81.9162	1.1316	3.5508
2	4856	15.393	21.8114	240.475	85.9087	1.3271	3.8623
2	4984	7.44527	8.77373	56.8443	36.7381	0.1817	0.6486
2	4990	12.2058	10.4124	83.0874	43.9045	0.2384	0.8975
2	4990	10.7056	9.13303	62.2861	40.715	0.1752	0.6182
2	4988	12.6117	12.0851	92.2592	54.3987	0.2879	0.9763
2	4989	10.7536	11.57	81.0468	51.4374	0.216	0.8414
2	4988	13.4339	12.9573	106.903	54.5682	0.3542	1.1904
2	4990	15.2148	15.1801	137.502	57.529	0.4915	1.5468
2	4982	16.06	13.7614	136.046	54.7072	0.4989	1.5596
2	4987	13.9195	13.4893	114.913	49.4217	0.4002	1.3627
2	4993	10.2515	12.2889	104.066	48.3337	0.3682	1.2172
2	4994	11.9509	10.5413	88.4689	44.7132	0.2812	1.0627
2	4993	10.6261	11.2972	91.6048	44.8097	0.3063	1.0458
2	4988	13.3724	12.6403	103.769	46.8801	0.3602	1.176
2	4986	11.517	10.4834	73.0999	38.9697	0.2668	0.7851
2	4992	13.1149	9.86103	90.547	42.4536	0.274	0.9612
2	4994	11.557	10.9799	78.5065	43.6617	0.2658	0.8465
2	4993	12.392	13.6515	116.326	46.5982	0.4482	1.3865
2	4987	12.8359	13.2408	137.098	54.9887	0.482	1.5722
2	5002	11.8588	12.732	129.5	53.8094	0.4696	1.4951
2	4988	16.1832	12.6448	131.608	50.3968	0.487	1.5624
2	4984	10.805	10.8354	94.564	43.982	0.3345	1.1032
2	4980	9.37519	8.97667	58.5751	38.0697	0.2193	0.7446
2	4964	10.5057	11.4602	87.4258	43.5675	0.32	1.0514
2	4987	8.57535	8.01975	56.9347	33.1409	0.2128	0.7107
2	4998	8.51614	9.17295	68.0686	39.7846	0.2527	0.8248
2	4986	8.52982	8.90997	72.3186	39.5494	0.2909	0.8952
2	4993	15.9711	17.2631	231.515	68.1324	0.8445	2.6844
2	4984	14.4777	12.3333	129.214	48.0942	0.5615	1.6242
2	4993	21.2723	25.6318	359.52	89.1218	1.4314	4.335
2	4991	14.4456	18.1542	220.369	67.691	0.8132	2.7402
2	4989	13.9162	12.3192	116.999	46.3949	0.3588	1.3819
2	4991	13.9495	11.6682	107.941	45.5023	0.3306	1.2608
2	4974	10.7463	11.0503	84.9496	42.7307	0.2571	0.8715
2	4987	11.7744	11.139	86.2466	43.8813	0.299	1.1305
2	4973	10.629	10.7938	72.2639	41.7195	0.2323	0.8626
2	4980	15.4366	12.7856	130.114	48.3373	0.416	1.6049
2	4986	8.82216	9.16753	55.6537	37.2058	0.1777	0.691
2	4988	6.8637	6.72693	26.7043	25.5438	0.0773	0.2636
2	4990	13.186	10.6564	89.2478	40.427	0.2806	1.0007
2	4982	7.72925	8.67166	50.8524	32.927	0.1951	0.6904
2	4995	13.5419	13.5303	116.404	48.6138	0.3784	1.4364
2	4993	11.921	14.1631	105.181	53.0253	0.3006	1.001
2	4997	12.7609	17.1841	142.019	72.355	0.3619	1.2952
2	4991	18.6374	26.0613	395.93	94.272	1.5126	4.8032
2	4993	15.415	16.6157	183.252	64.2816	0.7503	2.2166
2	4979	16.2645	18.1682	258.725	73.6642	1.1113	3.2812
2	4987	7.87869	7.93447	39.729	31.7695	0.1664	0.4794
2	4991	9.42327	9.7549	61.5958	38.2646	0.1855	0.636
2	4992	9.99449	11.1656	64.4611	37.4372	0.1717	0.587
2	4989	5.67238	6.3052	24.7185	26.0491	0.0758	0.28
2	4989	16.2713	24.0796	332.319	91.0817	1.3224	4.1898
2	4988	12.9126	14.1378	130.648	57.6849	0.4674	1.3128
2	4972	17.1254	19.1074	235.269	84.013	0.7696	2.5315
2	4988	15.957	16.5691	190.862	62.2256	0.8631	2.5349
2	4997	18.8635	20.974	303.637	84.3902	1.1934	3.7174
2	4994	12.4271	12.9588	109.704	52.2282	0.3298	1.0674
2	4986	12.8453	16.9472	137.959	54.1511	0.5295	1.6303
2	4990	16.5735	14.1622	162.451	56.1942	0.6068	1.8643
2	4977	12.2813	10.3285	74.9407	43.2708	0.2103	0.729
2	4985	11.3602	12.6391	93.4706	48.3563	0.248	0.8573
2	4985	11.1622	11.5543	76.8783	44.429	0.211	0.7288
2	4996	12.0774	11.8764	85.8466	47.8782	0.2268	0.8057
2	4995	7.38625	12.5797	81.3425	48.4999	0.1776	0.6327
2	4854	8.00143	10.1175	58.4612	40.2996	0.1449	0.5297
2	4994	14.5981	13.2604	111.879	50.9884	0.3425	1.1145
2	4990	13.193	12.3538	96.0536	46.0466	0.2803	0.977
2	4994	12.1698	10.8937	90.8792	43.4007	0.2803	0.9735
2	4986	9.56452	10.6125	64.2926	39.483	0.2776	0.791
2	4986	13.1642	11.0534	88.8283	44.56	0.2757	0.875
2	4987	7.16817	7.19042	36.8108	30.6047	0.1278	0.4105
2	4993	8.02409	8.84614	38.802	33.2512	0.1288	0.403
2	4989	7.6395	8.44016	41.9143	36.0811	0.1287	0.4396
2	4989	8.95011	11.9875	96.8255	45.7873	0.3175	1.0838
2	4986	9.56101	9.16465	56.4049	37.0053	0.2062	0.6233
2	4988	7.44763	7.90072	41.8289	33.4055	0.1529	0.4788
2	4992	11.4849	13.1483	129.589	58.0671	0.374	1.3055
2	4982	7.95878	9.04744	50.347	34.3833	0.154	0.5429
2	4975	7.21182	7.87556	40.2976	31.5251	0.108	0.3997
2	4992	9.95363	12.1181	59.8878	40.8865	0.1441	0.5325
2	4991	10.4515	10.4085	64.6496	42.181	0.1822	0.6364
2	4988	9.06433	10.4939	56.8789	40.4188	0.1479	0.5661
2	4880	8.56743	8.67777	51.746	37.0588	0.1474	0.5378
2	4979	7.8899	11.6579	71.8073	43.7316	0.1802	0.6473
2	4989	7.67124	10.2974	59.5785	43.9912	0.2132	0.5569
2	4989	13.7468	11.3548	106.362	46.2998	0.373	1.1381
2	4980	8.3941	8.60784	50.126	34.3424	0.1445	0.5211
2	4989	9.12824	8.36581	55.7359	37.4974	0.1566	0.5879
2	4995	10.7426	11.6497	67.5109	43.6866	0.17	0.6061
2	4973	9.42519	9.72172	51.9471	39.2543	0.1315	0.4668
2	4993	8.27424	10.0137	55.2096	38.2212	0.1444	0.5224
2	4994	8.66861	11.1612	70.4786	45.1584	0.2006	0.7418
2	4989	11.7311	12.4499	85.5729	46.3953	0.2214	0.8051
2	4988	11.2009	10.9072	72.6393	43.9636	0.179	0.6266
2	4998	9.5664	10.1455	58.4862	40.1127	0.1492	0.5542
2	4986	12.6268	14.399	102.543	53.0161	0.2683	0.9807
2	4987	6.17619	8.94397	44.9703	34.1515	0.1275	0.4461
2	4978	6.60637	8.89481	50.6245	38.2856	0.1168	0.4633
2	4989	9.08851	8.61265	48.6724	35.0453	0.1395	0.4851
2	4990	10.1283	9.64576	52.7354	36.9165	0.1344	0.4821
2	4990	8.98587	12.3633	88.9271	51.6372	0.2329	0.8386
2	4994	10.7453	13.7376	92.9455	49.8524	0.2675	0.9775
2	4995	11.7243	13.3804	96.2886	49.341	0.2023	0.9098
2	4988	9.20431	9.37142	65.6098	40.9941	0.1958	0.7046
2	4991	15.584	11.1661	122.721	48.3286	0.3796	1.2819
2	4978	13.8859	12.9687	115.3	50.266	0.367	1.2082
2	4986	12.9525	11.5513	119.143	48.342	0.3654	1.2594
2	4989	10.6992	12.3456	79.9209	44.9108	0.2287	0.7604
2	4989	8.21766	10.053	61.9567	40.8886	0.187	0.691
2	4976	9.22155	9.51347	51.8298	36.6578	0.1339	0.475
2	4983	10.0922	10.3697	63.4268	41.0503	0.1603	0.5595
2	4988	6.98996	8.25295	35.4816	29.9435	0.1086	0.382
2	4993	13.5068	10.7375	81.9356	42.085	0.2384	0.7347
2	4996	11.7431	12.2785	89.9423	46.9475	0.2346	0.8563
2	4991	9.55512	10.6061	67.9151	40.3216	0.2055	0.6875
2	4979	11.8549	10.5508	77.9069	42.1285	0.1903	0.6831
2	4984	7.4298	7.37416	35.7375	33.0736	0.0969	0.3437
2	4972	7.05673	8.02433	39.6779	31.4763	0.1203	0.4012
2	4988	11.2536	11.7948	91.156	45.54	0.2849	0.9835
2	4971	15.5763	15.3742	148.28	63.5125	0.4262	1.4206
2	4988	6.55306	8.0648	36.371	31.508	0.0948	0.3892
2	4997	10.7789	11.9771	81.5814	49.4053	0.2507	0.9005
2	4976	7.52262	8.3185	39.3606	34.239	0.1017	0.4083
2	4998	12.3955	13.355	95.735	50.4283	0.2321	0.9142
2	4972	11.3056	10.8712	74.7798	43.1588	0.1874	0.6785
2	4985	10.4472	12.5351	84.4633	49.1021	0.2306	0.7821
2	4982	8.69009	10.22	69.9189	41.1533	0.1812	0.7083
2	4979	7.38388	8.14267	51.3904	32.8655	0.1782	0.6177
2	4972	13.1732	10.3006	95.1212	44.8457	0.2953	1.0113
2	4991	10.7801	11.1832	73.5102	50.8465	0.2086	0.6892
2	4990	9.88068	14.7673	118.872	51.0254	0.3667	1.2546
2	4992	14.5549	16.8509	169.63	66.9179	0.5628	2.0581
2	4989	15.6787	18.719	226.905	69.2489	1.0766	3.195
2	4981	14.3464	16.6374	155.671	63.5955	0.4646	1.5767
2	4995	10.8539	11.7081	89.1265	48.2886	0.2565	0.9249
2	4990	13.8276	14.194	130.749	56.2815	0.3573	1.3113
2	4989	12.5659	13.0047	103.513	50.8866	0.2813	1.0585
2	4986	12.2271	12.0066	94.6777	45.6055	0.2655	0.9637
2	4985	10.8042	11.2659	74.5682	43.5684	0.1995	0.7109
2	4990	8.19077	8.84513	59.3258	38.5574	0.1846	0.6683
2	4992	9.4566	12.1044	91.4534	47.7637	0.2715	0.9489
2	4996	11.962	14.5061	136.639	56.437	0.4203	1.4286
2	4993	11.4764	14.3595	138.296	53.1492	0.5008	1.5901
2	4987	10.3322	8.88893	60.5028	37.57	0.1909	0.6852
2	4995	12.5767	11.6316	99.8288	46.1672	0.2879	1.0723
2	4989	9.88475	8.67389	67.253	37.166	0.2222	0.7599
2	4992	12.7042	11.496	101.054	43.3422	0.3096	1.096
2	4990	14.423	13.6138	123.704	52.1266	0.3877	1.2423
2	4984	13.9643	13.3486	115.776	48.9404	0.3532	1.1209
2	4994	12.9016	12.9361	94.1648	47.0176	0.2678	0.8958
2	4991	11.3442	12.0891	76.8403	42.0032	0.2175	0.766
2	4996	11.1867	11.6241	76.2694	41.8327	0.2281	0.7443
2	4988	9.44308	12.0834	89.2852	45.5818	0.2256	0.7833
2	4990	9.70227	10.9287	60.254	40.8338	0.1725	0.5514
2	4987	12.8299	10.6618	99.04	42.9973	0.3129	1.0978
2	4993	14.4661	15.406	144.126	60.3447	0.4372	1.4036
2	4992	15.3361	13.2387	123.369	51.8211	0.3887	1.3197
2	4991	12.8435	13.2782	97.9676	47.4129	0.2817	0.9557
2	4996	11.0362	10.7958	83.8675	40.5669	0.2359	0.8731
2	4993	12.1648	10.4549	86.5261	46.383	0.2544	0.8662
2	4987	11.5931	9.77355	74.9003	40.3563	0.2194	0.7912
2	4990	12.9004	9.85962	91.5531	40.9651	0.277	0.9833
2	4965	12.446	9.99113	82.9986	40.6542	0.2478	0.8455
2	4990	10.6572	12.8281	90.5684	45.8194	0.2593	0.9097
2	4981	9.34697	10.973	73.2526	40.1567	0.2064	0.7505
2	4985	8.50835	8.41581	53.7512	34.6461	0.165	0.606
2	4988	13.9171	14.3111	116.555	53.0198	0.3385	1.1574
2	4993	13.4304	13.1355	107.811	49.2272	0.3311	1.0829
2	4989	14.6766	13.7723	127.089	53.0582	0.3843	1.266
2	4992	11.7157	14.6249	144.656	59.599	0.4399	1.4291
2	4991	13.6568	15.8371	177.866	62.1788	0.655	2.139
2	4991	8.74263	8.62721	58.0184	35.2852	0.2078	0.7141
2	4992	12.8186	13.2516	123.273	51.1043	0.4857	1.5347
2	4991	11.1379	14.2187	130.214	53.04	0.5012	1.6606
2	4987	15.1966	14.8955	132.062	54.4104	0.4598	1.4555
2	4988	12.5519	11.5134	122.246	48.8577	0.4655	1.445
2	4982	10.3354	8.95125	70.3497	36.2924	0.2813	0.921
2	4987	9.29997	8.8703	69.5291	39.2837	0.218	0.8003
2	4983	8.60308	7.67622	51.9988	32.7882	0.1911	0.6478
2	4988	8.14498	8.04957	47.9876	31.1173	0.176	0.5879
2	4992	8.14417	8.70647	66.7424	41.2051	0.2526	0.8424
2	4987	13.1802	11.6979	112.418	47.9891	0.4065	1.3245
2	4984	6.82692	8.01359	50.5553	33.9625	0.1801	0.5811
2	4993	10.4253	10.8911	89.8155	43.1816	0.2915	1.0052
2	4991	10.4012	12.1049	99.8137	45.2514	0.4102	1.2648
2	4993	9.8532	9.67972	83.7469	42.8673	0.3286	1.0817
2	4988	7.29443	7.83205	39.3566	29.5538	0.1062	0.3706
2	4974	5.84625	7.36829	29.4044	25.6875	0.0868	0.3041
2	4989	9.85007	8.92645	73.7826	39.7426	0.2898	0.9647
2	4995	11.2726	15.1653	136.488	57.3563	0.4028	1.3345
2	4989	10.8233	11.4431	91.2132	43.529	0.2662	0.9624
2	4987	8.3288	12.5376	76.176	44.8622	0.2317	0.76
2	4987	12.4372	12.0877	113.747	49.1742	0.455	1.4025
2	4994	11.0354	12.6601	106.048	47.5112	0.3182	1.1485
2	4999	11.7368	13.6143	118.431	51.2899	0.3175	1.2706
2	4968	7.69204	8.37442	47.7124	32.6387	0.1387	0.4903
2	4986	11.3825	11.4324	80.2297	41.359	0.2511	0.7775
2	4989	9.57509	9.47641	75.2988	38.7161	0.245	0.8943
2	4985	8.78321	9.59824	67.291	36.2879	0.2204	0.7794
2	4977	8.56892	8.26841	58.375	32.9175	0.1872	0.676
2	4987	15.2856	15.6444	151.578	58.018	0.4587	1.5703
2	4978	8.46893	7.60642	46.6796	31.5068	0.1375	0.4439
2	4731	9.05909	9.75085	76.2096	40.0898	0.2743	0.8386
2	4979	11.0749	12.1325	116.689	50.2527	0.4164	1.3274
2	4983	10.2248	11.782	104.53	47.0997	0.3673	1.2008
2	4982	10.9176	9.34267	66.3051	42.6227	0.1956	0.6954
2	4990	8.17469	8.86823	59.2923	35.0715	0.2282	0.7529
2	4952	8.39831	7.98077	49.8555	35.1659	0.1881	0.6253
2	4985	9.30457	11.7462	91.5257	45.8221	0.3325	1.0699
2	4977	9.82389	12.6621	99.673	46.1566	0.358	1.1521
2	5010	15.2719	23.1926	345.801	89.9985	1.4568	4.645
2	4980	13.7255	18.1063	184.84	60.799	0.8007	2.394
2	4980	11.2274	11.4853	106.85	43.0486	0.4087	1.2901
2	4990	12.5195	12.5568	108.092	48.3316	0.4418	1.4183
2	4996	9.71111	11.0865	84.764	43.9194	0.3181	1.0509
2	4986	14.166	17.1318	185.956	60.7739	0.6893	2.1066
2	4995	13.4525	16.9121	186.053	62.4397	0.6633	2.1495
2	4990	14.6647	19.8455	208.809	70.2828	0.6218	2.2377
2	5000	15.2444	10.8516	108.396	46.1963	0.3457	1.101
2	4986	14.2796	11.521	99.8921	47.6675	0.3395	1.069
2	4993	9.36805	12.51	98.2655	49.65	0.3833	1.2231
2	4992	13.3689	11.2028	100.484	48.3635	0.3661	1.0888
2	4989	12.6026	11.4213	93.391	44.3971	0.2931	0.9881
2	4996	17.2611	18.2927	228.091	79.3933	0.7988	2.6
2	4991	10.3913	14.1132	106.185	53.6251	0.3543	1.1347
2	4987	13.1137	13.6451	129.006	58.9303	0.4224	1.3277
2	4992	13.144	12.3695	140.272	50.3257	0.4581	1.5302
2	4993	7.59021	9.62208	55.6304	39.7643	0.1914	0.5871
2	4992	10.8118	13.2051	97.4181	54.7315	0.3356	0.9691
2	4982	8.7173	10.2103	63.8036	40.6865	0.2159	0.6297
2	4987	8.7531	11.5905	77.9351	46.8939	0.228	0.7641
2	4980	6.80022	8.29533	44.8354	33.7037	0.1519	0.4873
2	4986	10.321	11.337	85.8976	49.781	0.2733	0.8729
2	4993	14.3506	17.2491	188.662	70.4736	0.6009	2.0529
2	4993	15.1055	17.6426	174.828	61.3397	0.5665	1.7843
2	4987	8.93064	11.2769	61.1086	40.5139	0.2083	0.565
2	4985	8.22188	8.64187	62.7227	36.5444	0.2071	0.7329
2	4972	14.0406	11.6646	108.422	46.3893	0.347	1.1425
2	4997	12.8931	11.6138	93.1616	45.8992	0.27	0.941
2	4985	8.3791	9.11872	65.744	37.2277	0.2027	0.7285
2	4987	12.308	10.7002	77.3272	41.9579	0.2123	0.7414
2	4981	8.83021	8.42916	53.099	34.0215	0.149	0.537
2	4973	9.75301	10.2642	71.0838	43.1146	0.2171	0.7812
2	4986	6.00552	6.29722	26.3056	25.6538	0.0811	0.2915
2	4983	6.96321	6.68452	28.7398	26.2292	0.0824	0.2846
2	4981	8.72238	8.03693	56.759	34.5129	0.1816	0.6374
2	4991	9.00855	9.82543	57.5293	38.6919	0.169	0.5804
2	4970	8.25145	9.64467	51.5864	34.8716	0.157	0.5648
2	4984	8.63688	8.87525	62.4005	37.3229	0.2024	0.7139
2	4993	12.4596	12.3754	107.311	50.6199	0.3631	1.2262
2	4996	13.5378	12.1785	124.808	49.6264	0.4046	1.3853
2	4970	9.40758	9.85508	77.157	43.5926	0.2846	0.983
2	4995	13.9125	21.1161	261.66	70.699	1.0615	3.6301
2	4993	20.2595	20.1074	292.333	78.3471	1.2317	3.7364
2	4990	17.1462	23.1422	273.157	78.7276	1.1833	3.6419
2	4991	12.3127	12.0397	94.0655	48.4502	0.312	0.8957
2	4989	10.8821	11.0158	95.903	47.6069	0.375	1.2343
2	4995	8.07808	9.79818	76.6784	43.824	0.2838	0.9565
2	4976	9.58389	9.15578	65.6594	38.6388	0.253	0.857
2	4991	11.9118	10.3095	94.2539	43.4467	0.3365	1.1361
2	4985	9.19773	9.66285	83.9202	43.712	0.2632	0.8379
2	4994	13.3514	11.5546	118.414	48.0571	0.3932	1.2572
2	4987	12.5084	14.0576	128.39	51.427	0.4168	1.3584
2	4976	8.33123	9.53093	75.2965	39.6317	0.243	0.8594
2	4990	11.3907	11.93	87.2158	45.4976	0.3476	1.0815
2	4987	7.76944	8.56662	61.1629	35.784	0.1985	0.6951
2	4977	4.18816	6.83359	25.9222	24.2271	0.0723	0.2693
2	4982	8.6003	8.46468	53.6114	35.2419	0.1456	0.5023
2	4990	11.5342	11.1947	87.0229	42.4229	0.2795	0.962
2	4982	6.79359	7.15653	36.4035	28.7742	0.1026	0.391
2	4989	11.6083	10.606	78.9505	39.7948	0.2084	0.7295
2	4990	12.4298	12.386	101.987	47.0849	0.3121	1.0789
2	4994	12.6325	16.0188	131.445	55.0769	0.4442	1.4915
2	4988	13.8248	11.9534	104.125	46.5835	0.3664	1.1911
2	4970	8.63521	8.08413	54.4881	33.7331	0.1931	0.6436
2	4974	10.6967	9.8669	78.8095	42.3789	0.2935	0.9929
2	4990	13.0985	12.1614	113.586	51.4927	0.4081	1.3609
2	4989	11.7968	11.3986	83.652	43.5909	0.2158	0.6747
2	4998	14.5857	14.0012	133.136	52.5137	0.4637	1.4531
2	4993	15.1809	14.8109	150.495	58.321	0.533	1.7208
2	4977	10.2925	9.22148	77.7374	42.0714	0.3	0.9926
2	1156	5.54129	9.89414	42.97	31.511	1.0205	3.1883
2	4986	13.4061	12.2908	113.786	50.2394	0.4317	1.4108
2	4988	9.76173	9.69482	78.9977	37.3055	0.2755	0.8528
2	4987	8.26128	8.83611	46.7676	33.998	0.1242	0.4188
3	4985	9.71525	13.0822	55.2328	41.4915	0.2298	0.8096
3	4998	12.2813	18.1267	88.2067	54.7961	0.3917	1.2556
3	4987	8.97709	13.991	51.53	40.8207	0.1837	0.6708
3	4979	8.18697	13.7342	48.0381	38.7712	0.1671	0.6049
3	4990	10.8585	16.4952	88.3617	53.9739	0.3651	1.3032
3	4982	10.8367	18.7334	82.0661	52.8862	0.365	1.261
3	4983	8.81328	13.2244	63.3963	42.3351	0.2245	0.8501
3	4965	10.4037	17.9193	82.3236	51.6479	0.4027	1.272
3	4980	10.143	15.2956	68.83	50.577	0.2924	1.0317
3	4778	7.58799	9.07844	29.5982	30.2805	0.1391	0.4514
3	4960	10.3084	15.453	77.4376	50.1237	0.3051	1.0954
3	4978	7.70255	12.9642	45.8436	39.7093	0.1691	0.633
3	4972	6.68684	11.4798	33.3033	34.4746	0.1184	0.4498
3	4989	7.60227	11.681	47.8317	38.9558	0.1731	0.6437
3	4985	4.98795	7.60703	19.2682	25.1517	0.0711	0.2577
3	4961	7.70001	10.9111	40.4165	35.5663	0.1641	0.5692
3	4988	11.7487	16.8771	75.7903	51.0959	0.3056	1.1463
3	4978	10.7093	15.1603	63.2212	47.211	0.2599	0.9056
3	4985	10.6053	15.2464	63.7248	46.266	0.2266	0.8673
3	4952	9.85323	14.2088	65.9175	43.7604	0.2346	0.8869
3	4963	9.10155	15.214	68.7024	46.698	0.2672	0.9714
3	4975	6.86291	10.2932	26.4098	30.2877	0.1018	0.3631
3	4974	10.8756	17.3392	87.9972	52.6113	0.3723	1.3184
3	4998	12.2197	18.197	97.1105	55.1651	0.4047	1.4629
3	4997	10.8566	16.6385	75.9369	47.2748	0.3018	1.0933
3	4992	9.53419	14.7997	67.9893	48.0717	0.2973	1.0148
3	4946	10.9197	14.9251	79.9378	48.5357	0.3026	1.1507
3	4988	5.82711	8.39697	24.3329	29.0581	0.082	0.3156
3	4932	12.5645	19.2082	95.8672	58.1358	0.4491	1.4623
3	4813	12.1932	20.6419	108.632	61.0907	0.5384	1.7732
3	4986	7.45441	13.1418	37.2828	36.8828	0.1406	0.5215
3	4988	6.1457	9.5148	22.7654	27.9143	0.0956	0.3299
3	4982	5.52448	7.9717	17.5053	25.3622	0.0723	0.2411
3	4929	8.6953	12.3527	45.4411	41.6124	0.2142	0.7022
3	4906	6.92811	10.33	34.1957	35.2482	0.1345	0.4689
3	4905	7.6619	13.2811	41.5363	37.3454	0.1561	0.5655
3	4998	10.2409	17.8585	75.1938	48.9873	0.314	1.1165
3	4990	7.04803	11.0142	30.5547	35.8868	0.1153	0.4247
3	4964	7.40319	12.1386	44.3824	35.3841	0.1685	0.6018
3	5048	11.7364	19.4007	91.8023	54.866	0.3818	1.3397
3	4990	6.24484	7.01158	17.3272	24.6056	0.0656	0.2375
3	4984	5.78658	8.35364	23.0241	26.8364	0.0994	0.3305
3	4979	5.34565	8.71073	20.4379	28.1701	0.062	0.248
3	4970	9.44038	14.973	70.0098	46.2378	0.3239	1.0359
3	4986	7.38886	10.4777	32.1722	33.3879	0.1279	0.441
3	4951	13.3638	19.5607	105.891	59.8007	0.5571	1.8363
3	4887	12.5998	18.5526	91.6727	55.1337	0.4354	1.4709
3	4972	7.78565	10.6619	37.2501	34.6206	0.1513	0.5366
3	4990	6.80438	8.68341	27.4167	31.6438	0.1107	0.384
3	4999	9.5809	14.169	58.0495	39.6586	0.2004	0.747
3	4904	10.2581	15.0348	76.2771	49.443	0.3468	1.1367
3	4971	7.75176	14.4865	49.7155	38.6988	0.1866	0.6586
3	4881	9.50445	12.6625	48.1754	42.2677	0.2449	0.769
3	4892	10.4016	15.6488	64.7432	46.3766	0.2693	0.9367
3	4973	7.6421	10.5317	31.6089	35.4469	0.1621	0.4965
3	4986	11.4799	17.998	83.9682	52.2794	0.4053	1.3692
3	4989	11.238	16.6973	82.6666	47.2522	0.4156	1.3529
3	4990	7.58675	10.5514	33.9557	34.1333	0.1231	0.45
3	4994	9.92283	17.2167	69.8063	47.9419	0.3188	1.082
3	4988	10.2697	15.7586	67.3864	44.7112	0.2533	0.9239
3	4940	13.1074	19.8392	111.325	59.8283	0.5727	1.8295
3	4954	11.42	16.8106	87.6738	53.2331	0.4753	1.5466
3	4938	9.15288	13.3683	53.3282	42.6567	0.2253	0.7623
3	4977	6.63868	9.11854	26.5956	31.448	0.1078	0.3702
3	4983	8.11509	11.6607	45.9639	37.6377	0.1787	0.6323
3	5000	8.42431	13.9765	51.5572	40.4083	0.1935	0.7024
3	4957	11.3781	14.3057	67.3196	48.7171	0.3089	1.0948
3	4972	7.88921	11.4756	37.0284	37.6887	0.1583	0.5425
3	4989	10.0251	15.1738	68.7516	44.5561	0.291	1.0032
3	4981	9.48858	13.4426	61.5455	44.0213	0.2372	0.8419
3	4993	11.363	18.6549	98.494	55.6835	0.4942	1.5621
3	4954	8.21701	13.1014	45.3041	39.037	0.171	0.6123
3	4972	8.48757	13.4061	53.3546	42.3648	0.2185	0.7801
3	4994	9.54187	13.0423	60.3714	44.1424	0.2808	0.9197
3	4981	7.99183	12.4688	36.8513	35.1637	0.1449	0.4966
3	4996	6.59565	8.53108	26.3947	30.4324	0.0933	0.3404
3	4983	6.34467	10.2938	30.3506	30.6195	0.1075	0.3938
3	4947	8.68063	12.2073	46.9095	39.7068	0.1821	0.677
3	4963	9.87795	13.6816	52.7511	42.5353	0.2202	0.7744
3	4998	10.3243	17.5801	74.1109	48.2097	0.3299	1.0916
3	4963	8.3993	11.3466	48.1901	40.1336	0.2083	0.6976
3	4994	10.7635	14.8688	78.8283	50.4234	0.3574	1.2219
3	4987	7.68543	12.8673	47.888	35.7176	0.1846	0.6905
3	4920	6.55076	9.63543	26.4069	29.9058	0.1162	0.4438
3	4976	11.6956	19.2269	92.7265	55.7732	0.49	1.58
3	4900	5.74165	7.1989	19.9961	27.1307	0.0775	0.2698
3	4960	7.32993	11.1769	35.4822	34.034	0.1262	0.4791
3	4945	8.14264	12.1098	40.6294	37.5793	0.1327	0.527
3	4977	7.81056	12.1686	45.8103	38.2728	0.168	0.6089
3	4954	8.69462	12.2748	50.2546	40.6861	0.2084	0.7073
3	4931	8.35465	10.8889	44.7028	37.2688	0.1382	0.5567
3	4985	8.7473	11.8976	51.627	39.9157	0.1795	0.6753
3	4976	8.66103	10.9404	41.7304	37.5788	0.1392	0.5433
3	4983	10.0212	16.4082	67.5733	45.9477	0.2586	0.9732
3	4938	9.40903	16.5991	69.0996	45.7609	0.2395	0.9169
3	4975	7.69849	10.6396	36.5549	32.434	0.125	0.4744
3	4991	7.34592	12.6768	43.401	35.1079	0.1478	0.573
3	4950	8.13066	9.62801	36.04	34.1666	0.1213	0.4505
3	4960	9.38579	13.642	62.7735	41.2752	0.2152	0.8296
3	4978	8.59577	11.749	40.7016	36.6198	0.1483	0.5584
3	4964	11.3983	17.3367	90.8411	52.2645	0.3541	1.2913
3	4926	9.17273	12.9553	41.1671	39.0159	0.1305	0.5454
3	4987	7.60152	12.2504	50.5119	36.8481	0.2051	0.7453
3	4990	7.36425	11.2737	34.1769	36.3243	0.1273	0.4777
3	4938	9.15135	11.7471	47.2288	38.1688	0.1601	0.6292
3	4974	6.21512	7.96139	24.9597	25.1953	0.0748	0.3147
3	4936	7.49667	10.7408	27.9389	35.981	0.1344	0.4463
3	4995	6.20163	10.4078	28.8805	31.8488	0.1237	0.4167
3	4995	7.78427	13.3179	41.1695	37.3057	0.1566	0.5704
3	4989	9.12616	16.1364	62.8402	44.1254	0.2492	0.9281
3	4993	8.85594	13.8989	43.5983	39.1906	0.1775	0.6106
3	4986	10.3613	15.5408	62.7564	47.2549	0.2858	0.9656
3	4992	10.404	16.9565	78.9197	48.9903	0.2394	1.0175
3	4987	9.68938	15.6963	62.7053	43.5062	0.2051	0.8267
3	4982	10.1331	14.3392	59.99	46.0441	0.2825	0.9068
3	4986	6.23778	7.54708	21.7541	27.0468	0.0693	0.2713
3	4960	12.2407	17.7979	96.8725	55.6052	0.4761	1.5667
3	4983	10.9753	16.6422	80.022	49.2022	0.3707	1.2431
3	4988	7.9203	9.43783	33.4166	32.6691	0.1441	0.4831
3	4990	8.8387	14.4249	60.2587	39.6725	0.1795	0.7739
3	4976	6.92131	9.1075	30.1872	31.2456	0.0973	0.3809
3	4996	9.86769	13.7078	66.4285	43.9251	0.2992	1.0133
3	4929	8.64366	11.8911	43.3605	37.3821	0.1438	0.5674
3	4993	9.27855	14.3264	54.8459	46.6757	0.284	0.8839
3	4961	6.666	9.43533	30.1504	32.2829	0.1362	0.4434
3	4968	7.85501	10.6613	35.6929	37.9639	0.1336	0.519
3	4971	4.94225	7.91214	17.9113	23.2917	0.0681	0.2493
3	4929	7.56884	11.851	35.2466	36.4112	0.1529	0.519
3	4992	9.44426	15.6934	60.3638	43.2179	0.2907	0.9305
3	4937	10.1531	15.1923	68.6282	47.9401	0.2954	1.014
3	4993	11.9108	16.6894	86.3007	54.4613	0.4398	1.4157
3	4998	8.78455	11.7068	44.8965	40.1024	0.1475	0.5819
3	4951	7.46128	10.8937	31.1192	33.4485	0.1142	0.4119
3	4994	10.1105	14.8789	63.6067	44.8411	0.2632	0.9102
3	4996	8.36413	13.9846	35.1131	40.462	0.1705	0.5735
3	4977	11.5899	16.3331	83.8168	49.7628	0.4036	1.3272
3	4944	11.7259	16.7756	76.984	50.713	0.3809	1.2296
3	4973	7.67139	10.3327	33.8372	34.2803	0.1587	0.5036
3	4993	9.95317	14.0008	58.8269	45.8461	0.2681	0.9303
3	4892	9.67962	14.9148	59.6465	43.953	0.2568	0.8987
3	4926	7.55719	11.5515	36.5602	35.6352	0.1879	0.5625
3	4948	9.86016	15.3494	65.3778	46.0195	0.2761	0.9722
3	4965	6.43667	9.96692	27.9104	32.1801	0.1015	0.3685
3	4966	7.84498	11.2827	28.629	37.1552	0.1223	0.4434
3	4984	7.50266	8.44879	27.3412	31.5748	0.0785	0.3211
3	4971	6.39616	9.66178	28.585	30.7134	0.08	0.3246
3	4984	7.43085	11.3274	33.0909	31.8185	0.1043	0.4141
3	4993	9.03166	12.942	58.1625	41.9216	0.1842	0.727
3	4983	8.21985	12.9374	39.3718	37.7771	0.1069	0.4756
3	4978	5.14605	7.91516	13.4616	25.0323	0.0554	0.1921
3	4943	6.64206	11.2581	28.9928	35.0478	0.1716	0.4858
3	4959	10.585	14.8358	73.0573	46.8308	0.2666	0.9788
3	4998	9.28363	14.6674	54.237	41.7427	0.1785	0.6939
3	4986	7.64921	9.42121	29.1526	32.0132	0.0774	0.3448
3	5020	9.90883	17.1093	78.7501	47.7523	0.2828	1.0927
3	4994	7.12584	10.4865	22.8506	34.1557	0.0957	0.3303
3	4993	10.1068	13.8567	62.2925	43.3431	0.254	0.8939
3	4989	7.68354	10.1199	31.2866	33.6981	0.1092	0.4236
3	4967	9.53152	15.8666	59.6589	43.7053	0.2293	0.8239
3	4994	7.2501	10.9756	34.0491	34.5694	0.136	0.5051
3	4942	8.0443	12.8036	35.1225	39.4571	0.177	0.5814
3	4925	7.39972	12.5354	32.7938	35.5312	0.1607	0.5211
3	4983	6.03814	9.3458	21.2974	29.5192	0.0972	0.3165
3	4980	5.16967	7.44609	18.8254	26.0171	0.0749	0.2669
3	4981	6.38499	8.64029	23.7578	30.6307	0.0914	0.3337
3	4954	6.89521	12.3608	34.632	34.991	0.1695	0.5622
3	4866	7.9727	11.0218	40.3618	38.7555	0.186	0.6423
3	4981	7.65492	14.32	40.3104	38.8776	0.1856	0.6274
3	4993	5.64591	8.58874	22.6753	28.5656	0.089	0.3183
3	4984	8.46065	10.6168	38.0825	37.567	0.1791	0.6058
3	4930	6.41404	9.18835	19.6864	29.9273	0.0914	0.3072
3	4960	8.20655	12.9416	33.8292	38.1663	0.1865	0.5862
3	4938	6.46678	8.1701	22.8718	27.6712	0.0872	0.3128
3	4838	8.53813	12.5726	40.2094	39.9531	0.226	0.7132
3	4872	6.95081	12.1674	31.5423	34.929	0.1509	0.5022
3	4906	6.7688	10.2461	24.1433	33.3876	0.1241	0.3946
3	4930	7.94626	15.0897	38.9922	43.8779	0.2029	0.6706
3	4931	6.97576	11.995	29.1235	34.3521	0.1478	0.4792
3	4987	7.93962	10.3726	27.76	35.4081	0.1446	0.4655
3	4965	7.75824	12.2534	38.9226	40.8419	0.2074	0.6784
3	4983	5.61176	8.59881	16.9427	28.5031	0.0772	0.2613
3	4916	7.18632	10.4094	33.6568	34.586	0.1703	0.5663
3	4980	10.9644	17.9243	86.877	51.7866	0.3902	1.3164
3	4983	7.61773	10.7038	36.5735	33.6444	0.1251	0.4739
3	4987	12.6913	17.6932	95.3938	56.3677	0.4298	1.4499
3	4995	8.14671	11.0594	35.7599	36.5794	0.1274	0.4781
3	4976	6.45155	9.58853	24.3568	29.0991	0.1095	0.3446
3	4985	7.01927	9.7596	36.7528	31.5134	0.1559	0.5221
3	4978	10.4808	15.4701	59.5419	45.6589	0.27	0.8903
3	4986	7.32942	11.7448	35.3871	32.7036	0.1263	0.4598
3	4984	8.55763	11.2962	48.0857	39.9997	0.1817	0.6562
3	4984	6.35895	9.41607	33.4698	31.5724	0.1158	0.4277
3	4981	7.18905	10.931	33.5884	32.2483	0.109	0.4263
3	4988	10.4376	15.6908	79.5263	50.729	0.3139	1.121
3	4908	6.77189	8.49849	27.3018	29.6177	0.1053	0.3692
3	4988	10.9901	17.5708	65.4356	48.9554	0.2677	0.9701
3	4986	7.6189	11.6673	36.6467	32.6761	0.1281	0.4855
3	4783	13.0062	17.6812	99.8608	52.1011	0.4835	1.6303
3	4972	7.81652	10.456	49.8519	41.2257	0.1692	0.6441
3	4925	8.67368	13.3643	61.5448	41.4747	0.2844	0.9469
3	5000	14.2781	21.0093	107.768	59.6316	0.5182	1.7558
3	4987	10.0825	16.5188	73.6717	48.9478	0.3205	1.0905
3	4982	9.3009	14.7718	51.8481	41.5205	0.2002	0.7273
3	4994	7.59311	11.2356	37.2199	33.8942	0.1427	0.5172
3	4911	8.63724	12.7275	43.8808	38.1811	0.1355	0.5659
3	4950	11.3476	18.0949	83.6653	50.9714	0.3664	1.2492
3	4985	5.44569	7.31797	20.9542	25.2435	0.0874	0.3038
3	4992	5.97253	10.1954	23.1578	29.3345	0.1077	0.3423
3	4991	9.18426	14.4543	55.1933	41.4841	0.1959	0.7539
3	4964	8.78325	14.157	55.5124	39.5511	0.2312	0.8118
3	4979	6.35737	10.7507	28.2129	30.1037	0.1085	0.3816
3	4952	8.9779	14.0621	67.8339	43.9711	0.2719	0.9652
3	4969	12.3336	18.2819	103.639	57.4753	0.4531	1.6058
3	4935	8.70698	13.4359	46.8241	40.4774	0.1722	0.6398
3	4987	5.29026	8.56771	19.4531	24.3611	0.0679	0.2541
3	4990	6.67368	10.0604	28.386	28.5705	0.1015	0.3772
3	4959	6.09952	10.9927	30.2655	32.106	0.1002	0.3912
3	4973	5.35764	6.84548	19.6418	22.4394	0.0661	0.2464
3	4984	8.0009	12.8343	49.7397	40.4867	0.1731	0.6551
3	4988	8.12848	10.1349	47.474	38.1861	0.2453	0.9446
3	4973	7.88796	14.4667	56.9818	40.268	0.2043	0.7747
3	4994	8.27587	11.1306	45.9373	37.9981	0.1916	0.6691
3	4910	7.7944	11.3677	41.1358	38.4121	0.1939	0.6134
3	4951	9.10596	13.7416	59.5555	41.1129	0.2442	0.8729
3	4987	8.10254	12.7732	41.8159	36.5952	0.1738	0.5958
3	4990	10.1699	17.463	77.5413	50.4065	0.3704	1.2156
3	4828	12.1382	18.8249	105.13	58.7183	0.4835	1.6429
3	4910	12.1784	21.3428	102.924	57.916	0.4508	1.5802
3	4991	10.9672	19.1963	91.6549	54.2167	0.3713	1.3302
3	4949	7.32061	11.8498	36.7548	34.127	0.1359	0.5009
3	4963	9.24117	15.1313	68.656	45.8526	0.2411	0.9152
3	4968	8.74923	13.0552	59.3373	40.7001	0.221	0.8105
3	4990	7.41997	12.7314	43.9083	35.4428	0.1467	0.5717
3	4946	9.96698	13.8606	67.2776	47.4901	0.2801	0.9836
3	4972	6.97746	10.3819	30.2194	33.4989	0.1172	0.4172
3	4976	9.08599	15.4259	59.3775	41.6688	0.1785	0.8071
3	4966	9.25225	10.2475	44.0976	37.5321	0.2221	0.62
3	4954	7.70686	9.96176	40.8422	33.5455	0.1468	0.5428
3	4983	12.2583	19.629	91.3751	55.2451	0.3433	1.273
3	4980	8.77092	12.5803	46.679	41.3888	0.1891	0.6737
3	4990	8.54054	13.376	42.4026	38.1265	0.1523	0.5619
3	4888	9.94877	15.814	72.3172	46.6991	0.2645	1.0089
3	4998	11.0761	16.6588	83.0791	50.7644	0.3668	1.268
3	4978	5.7601	6.4124	16.0339	23.7403	0.0545	0.2014
3	4978	5.99632	9.05672	24.7376	25.882	0.0789	0.3161
3	4976	6.06563	7.40204	21.9583	26.108	0.085	0.2913
3	4950	8.50393	13.1519	51.0806	40.3494	0.1917	0.7163
3	4914	8.57893	12.2059	46.953	40.0158	0.189	0.6623
3	4987	6.50542	7.28619	26.0638	28.3588	0.1072	0.3668
3	4988	9.40689	14.9086	66.3069	45.7702	0.2538	0.9218
3	4965	10.0348	14.6579	73.3154	48.8965	0.2751	1.033
3	4969	12.1721	17.1774	92.9765	56.9885	0.3977	1.4061
3	4940	10.1393	16.6614	79.4846	47.6372	0.3503	1.1849
3	4938	12.2584	19.8725	97.6083	57.8281	0.4364	1.528
3	4947	7.14463	10.9903	32.1944	33.4794	0.1185	0.4307
3	4985	8.24224	13.4281	51.1603	39.3473	0.206	0.7087
3	4927	7.7951	12.8516	41.618	39.152	0.1862	0.6281
3	4987	8.49804	10.43	46.1047	38.1453	0.1697	0.6142
3	4952	8.8421	14.1991	56.9675	41.3718	0.211	0.773
3	4938	5.06189	7.03235	14.9902	23.4019	0.0553	0.1923
3	4982	5.64682	7.79128	23.9042	24.8072	0.081	0.3038
3	4932	6.79443	11.3937	28.6228	34.6791	0.155	0.4847
3	4924	7.53027	11.102	33.7417	40.3883	0.1878	0.5913
3	4955	7.72781	10.2253	34.4182	37.5205	0.1737	0.5691
3	4883	7.86778	13.2673	29.1849	37.8214	0.1545	0.503
3	4928	7.48251	11.9256	27.8787	36.7844	0.1537	0.4825
3	4938	7.36391	12.8574	36.6681	38.3901	0.2033	0.6448
3	4948	6.58313	10.4658	26.1193	31.9287	0.1426	0.4547
3	4999	8.65537	13.5576	39.5654	39.7136	0.2013	0.6717
3	4887	8.51766	14.1178	35.5795	39.7952	0.186	0.601
3	4985	7.02622	10.9376	24.1368	35.3366	0.1011	0.3069
3	4965	7.95323	13.4824	37.1028	40.4524	0.2017	0.6664
3	4946	7.43558	10.0435	30.1685	32.8481	0.1361	0.4649
3	4989	6.9897	11.8472	30.3323	35.821	0.1487	0.4917
3	4893	7.50911	11.0538	26.7489	37.0749	0.1403	0.4552
3	4981	8.35624	14.2695	40.9913	43.3703	0.2189	0.7197
3	4982	6.11777	6.73071	17.4169	26.5168	0.0669	0.2392
3	4953	7.40762	10.6349	35.7611	36.4762	0.1753	0.5687
3	4991	6.95523	10.0565	27.1929	33.203	0.1142	0.4042
3	4972	7.49725	11.8024	31.0046	36.3832	0.1656	0.532
3	4962	8.64624	12.9494	37.6954	38.962	0.2022	0.6548
3	4988	8.38338	12.7325	40.0369	39.6854	0.2197	0.7117
3	4909	6.66944	11.4184	26.0984	34.113	0.1348	0.4386
3	4933	7.48254	11.9817	32.2227	36.9284	0.1721	0.5448
3	4948	8.84382	12.089	46.4366	41.5444	0.2152	0.7516
3	4946	7.77239	11.3404	29.1819	34.0685	0.129	0.4433
3	4977	6.8771	11.1176	28.0192	33.2932	0.1224	0.4225
3	4934	7.31623	11.2565	30.9745	33.2894	0.153	0.5061
3	4977	8.60445	15.9671	65.9294	44.3086	0.2535	0.8931
3	4947	11.0334	17.5716	76.1867	51.8173	0.3814	1.2762
3	4986	8.62526	14.0414	32.2408	40.314	0.1749	0.5643
3	4950	6.95914	10.6774	27.2277	34.769	0.1513	0.471
3	4976	7.65324	10.4071	25.3534	32.7012	0.1136	0.3945
3	4982	6.14064	9.40638	17.5566	28.7696	0.0862	0.2792
3	4951	7.35059	9.51084	25.2335	32.9301	0.1289	0.4166
3	4958	5.8356	8.66288	24.5986	28.1335	0.1008	0.3588
3	4955	6.88882	12.088	31.7253	36.615	0.1446	0.4915
3	4880	6.07403	9.19126	25.9491	28.447	0.0952	0.3541
3	4868	7.23968	11.936	29.5311	34.1386	0.1475	0.488
3	4949	6.88668	11.0984	23.8781	33.7207	0.1141	0.3769
3	4993	6.19859	11.0094	26.625	32.267	0.1256	0.4152
3	4954	5.97241	7.64042	18.8989	27.8724	0.0779	0.2718
3	4963	10.7334	16.0748	84.6205	50.6663	0.4044	1.3172
3	4926	7.46803	11.1785	29.636	34.5969	0.1463	0.4757
3	4881	7.29798	11.5599	31.046	35.317	0.1593	0.5126
3	5015	8.51748	13.2636	45.0719	41.0666	0.2419	0.7747
3	5000	7.91686	11.0061	38.463	38.9924	0.2084	0.6673
3	4871	7.89612	12.2671	32.5886	40.3071	0.1876	0.5893
3	4981	7.57388	9.75773	32.3763	35.6689	0.1731	0.539
3	4917	8.41451	12.0747	38.6919	40.5349	0.2121	0.6633
3	4850	9.01074	12.552	41.4564	39.6634	0.213	0.6936
3	4993	4.83495	9.52002	17.7947	26.0551	0.0774	0.2701
3	4932	7.72965	14.0249	41.4274	42.4503	0.2453	0.7512
3	4963	7.38703	12.0358	38.7943	40.7582	0.2031	0.6583
3	4975	6.25973	9.41754	23.9396	30.4459	0.1078	0.3663
3	4934	7.43994	11.1058	23.967	33.8708	0.1091	0.38
3	4973	7.27857	10.8992	30.2829	35.2076	0.1328	0.4737
3	4967	7.09679	12.0418	34.8759	37.7025	0.1697	0.5557
3	4982	5.85436	9.15202	19.5784	27.8192	0.0874	0.3
3	4945	8.41764	14.1118	37.4861	41.4966	0.168	0.5827
3	4912	6.79165	11.3104	27.2513	35.6395	0.143	0.4612
3	4947	6.61078	10.6705	27.6888	32.9749	0.1258	0.4392
3	4968	6.90343	9.91397	36.1586	39.0152	0.1765	0.5965
3	4960	6.57841	10.9014	33.2682	36.8645	0.1712	0.5613
3	4924	8.22735	13.4266	38.2636	37.3506	0.1754	0.6034
3	4978	6.12405	10.4525	22.5219	32.8025	0.1123	0.3707
3	5012	7.64749	12.3213	32.1203	36.9248	0.1621	0.5298
3	4935	6.85163	12.371	36.9814	40.6453	0.2062	0.6553
3	4879	6.7693	11.7015	31.9291	35.1812	0.1795	0.5614
3	4943	7.37527	12.2229	39.1559	41.8491	0.2062	0.6632
3	4912	8.29439	14.2324	44.5529	44.1674	0.2756	0.8314
3	4989	7.46331	10.3486	29.1521	36.8385	0.1575	0.5034
3	4939	8.19827	11.0782	32.242	36.4	0.192	0.5804
3	4895	7.61056	9.86883	32.0678	36.239	0.1696	0.5345
3	4954	9.05661	13.6266	35.7607	39.9058	0.1944	0.6078
3	4888	8.4429	13.9716	37.8869	41.373	0.2087	0.6651
3	4986	6.4731	9.33017	26.3068	33.3073	0.1182	0.4024
3	4902	8.03044	11.3783	35.3355	37.1088	0.1906	0.6053
3	4942	8.48744	12.3046	31.1183	37.6449	0.1879	0.5743
3	4922	8.40916	10.7302	35.8799	38.6082	0.1985	0.633
3	4919	8.18564	12.8529	37.3357	41.382	0.226	0.6852
3	4994	9.41128	12.5555	50.9495	39.8296	0.1833	0.6915
3	4953	10.359	15.5736	53.7866	44.6773	0.2046	0.7593
3	4996	9.23759	12.0789	52.8226	40.7856	0.1857	0.7149
3	4953	11.3929	16.2459	72.2988	49.1086	0.2493	0.93
3	4981	8.56941	11.3362	40.0065	35.7734	0.1635	0.5353
3	4951	7.41279	10.239	29.8512	33.317	0.1236	0.4287
3	4991	9.06459	12.7039	49.8462	39.3834	0.1657	0.6174
3	4985	10.2512	13.049	68.5559	45.1564	0.2533	0.9675
3	4998	10.6282	15.1859	68.6545	46.7285	0.3087	1.0299
3	4964	6.24157	8.83982	33.1058	32.7396	0.1193	0.4307
3	4992	7.96801	11.9348	43.1554	35.7179	0.1376	0.5557
3	4992	9.59861	11.5839	52.6229	41.8496	0.2329	0.7856
3	4992	7.24157	10.5619	39.5451	32.6421	0.1288	0.4733
3	4986	6.65527	7.07929	22.5845	26.3679	0.0785	0.2922
3	4974	6.96936	10.0307	25.3363	32.3304	0.1221	0.3956
3	4983	8.17485	12.7963	35.093	36.0398	0.1925	0.6123
3	4977	8.17088	12.381	30.5517	36.153	0.1579	0.5098
3	4922	8.59854	13.5023	33.9743	39.8846	0.1804	0.6854
3	4980	8.69535	15.7307	66.1722	44.7086	0.2775	0.9951
3	4969	7.45831	13.1014	50.3545	41.8941	0.215	0.7466
3	4941	8.81135	11.235	43.2956	37.7595	0.1573	0.6538
3	4995	11.3794	16.8782	79.234	54.5668	0.4326	1.3791
3	4952	8.59904	12.633	49.1616	42.1445	0.2103	0.7703
3	4953	11.633	16.7696	93.624	51.7842	0.4141	1.4565
3	4959	8.91872	13.5037	60.5133	42.4996	0.2094	0.8188
3	4989	7.36307	10.9159	35.5429	35.7029	0.1306	0.4807
3	4913	6.47487	10.1232	31.576	32.5083	0.1494	0.4948
3	4982	8.43917	11.7704	43.2103	40.1552	0.1995	0.656
3	4988	7.30869	12.0543	34.1098	33.3709	0.1152	0.4367
3	4923	6.46251	10.6019	31.6154	35.5354	0.1457	0.4941
3	4971	5.64742	9.17423	16.9603	27.0271	0.0721	0.2464
3	4989	8.93193	11.7687	40.7771	40.5381	0.2188	0.697
3	4991	7.64297	10.7918	26.1889	35.5255	0.1495	0.4638
3	5056	11.3801	20.0449	85.6511	61.1353	0.4118	1.451
3	4981	11.8895	18.3071	84.1053	57.3864	0.4981	1.4559
3	5021	11.3504	17.0248	72.0427	56.3088	0.3391	1.1864
3	4993	11.2817	20.1378	103.553	59.6213	0.5411	1.8612
3	4988	9.26369	13.0337	38.0676	43.8011	0.1817	0.619
3	4967	10.3078	14.4209	53.4502	46.2115	0.2347	0.8247
3	4991	9.26972	15.4584	47.6113	47.5743	0.2276	0.7911
3	4946	8.55767	13.7653	55.4281	43.7044	0.268	0.9358
3	4932	11.3794	15.3366	88.5727	50.6179	0.5149	1.6519
3	4992	9.65758	16.4377	60.1081	48.2137	0.2927	0.9886
3	4962	7.98141	12.3355	32.237	37.8141	0.1404	0.4881
3	4953	9.57202	15.0205	62.0031	48.2213	0.2615	0.9515
3	4947	10.4793	19.6052	81.5495	54.4062	0.4833	1.5461
3	4973	6.75534	11.5632	23.9403	33.6755	0.095	0.351
3	4935	9.21002	14.339	50.2246	42.1178	0.2246	0.8146
3	4923	11.4497	18.3041	88.9466	54.4971	0.4582	1.5443
3	4978	11.8326	18.7796	86.6002	56.2579	0.4601	1.5339
3	4960	7.67534	13.6097	45.4404	42.5103	0.1977	0.7125
3	4913	7.3317	10.7587	30.1624	36.8636	0.145	0.4859
3	4936	8.65956	12.8214	38.9381	39.203	0.1965	0.6783
3	4968	4.97363	8.80731	17.8085	28.6575	0.07	0.2538
3	4985	8.635	16.314	60.9431	45.8227	0.2463	0.906
3	4988	6.7656	9.76932	21.2399	30.4261	0.0964	0.3272
3	4955	9.39396	14.028	50.5872	44.3819	0.1912	0.7208
3	4706	12.8249	18.9659	102.281	60.3294	0.5371	1.8216
3	4979	11.0051	17.9163	71.1123	52.2822	0.3523	1.1997
3	4910	10.591	16.5272	57.7215	48.7505	0.2453	0.8898
3	4883	9.14429	14.4174	40.2663	42.7245	0.1715	0.6225
3	4962	7.1991	10.7967	25.4386	33.6052	0.1148	0.4037
3	4989	7.52963	10.6783	29.9335	34.8997	0.1277	0.4638
3	4873	10.3337	13.9825	46.7836	42.0676	0.1958	0.7118
3	4989	5.60709	9.05722	18.4913	27.7296	0.0716	0.262
3	4969	4.99226	7.83675	15.9266	23.9803	0.0669	0.2356
3	4829	8.59985	12.1898	44.7393	40.818	0.2044	0.7053
3	4946	7.07361	12.311	30.7336	36.2652	0.1646	0.5365
3	4937	7.4404	12.5948	39.3812	39.6586	0.1796	0.6101
3	4926	7.39444	10.6628	33.3237	38.2219	0.1767	0.5743
3	4717	4.04325	7.92049	15.1376	21.2156	0.0655	0.2187
3	4962	8.91433	11.6302	40.1949	39.0069	0.151	0.5302
3	4986	5.73603	7.81224	14.8423	24.4773	0.0671	0.2129
3	4965	8.3837	13.7839	42.7879	40.0995	0.2098	0.7053
3	4814	12.3683	17.9813	74.5204	53.8231	0.3614	1.2641
3	4978	6.25877	9.81902	22.4326	31.8864	0.1024	0.3416
3	4996	8.24501	11.8349	33.9431	37.7079	0.1489	0.5089
3	4961	8.71143	13.5227	39.8983	40.8948	0.1756	0.5898
3	4987	10.062	13.0314	57.243	44.4466	0.2308	0.8423
3	4914	7.65351	11.4157	35.5988	33.4177	0.1604	0.5466
3	4874	7.26073	12.6978	40.4552	40.9345	0.2124	0.6813
3	4921	6.68615	11.5482	28.1247	35.8919	0.1514	0.4815
3	4988	6.25301	11.2954	32.9549	31.3476	0.117	0.4127
3	4981	6.22794	10.7588	23.4929	30.5995	0.1054	0.3537
3	4856	5.78574	9.80255	29.6742	32.9937	0.1035	0.4148
3	4986	6.29138	11.6097	31.3741	31.6101	0.0818	0.2858
3	4916	5.97317	11.2393	18.8828	29.2254	0.0954	0.3058
4	4981	7.93074	11.5532	33.9682	33.9555	0.1796	0.4415
4	4936	9.6625	15.5884	62.8946	43.8062	0.4389	0.9836
4	4986	9.35861	13.9268	58.6399	43.1116	0.3797	0.8073
4	4909	8.84876	13.456	41.628	37.6389	0.3137	0.6171
4	4989	8.92111	11.8612	39.237	38.4864	0.2609	0.5721
4	4979	10.0795	13.8175	56.9284	42.8512	0.3364	0.8377
4	4983	8.6118	14.0102	50.2006	43.6648	0.3514	0.7374
4	4974	6.45858	10.1956	20.2225	31.6802	0.1159	0.2756
4	4983	7.56327	11.9212	31.8702	37.5266	0.2308	0.4574
4	4965	10.0127	12.8334	49.6791	41.5322	0.3967	0.768
4	4985	5.84268	9.75211	21.272	27.8078	0.1398	0.2914
4	4963	9.17327	13.8649	60.2375	44.5992	0.419	0.9855
4	4995	10.6771	15.9508	59.723	46.6595	0.469	0.9386
4	4983	7.9992	11.7678	35.8482	33.9016	0.2398	0.5206
4	4974	6.31981	8.60527	22.8585	30.2473	0.1613	0.3728
4	4983	6.17308	10.2345	30.8325	31.5625	0.172	0.4163
4	4988	6.74395	12.1081	26.2391	35.502	0.176	0.3677
4	4988	7.79876	13.3196	44.7467	38.654	0.2302	0.5744
4	4988	9.88674	12.0666	49.1994	39.7221	0.3851	0.7126
4	4971	6.81626	11.1395	32.8413	30.8585	0.2624	0.5067
4	4984	10.1767	14.7032	61.5746	43.8249	0.3147	0.7064
4	4983	7.50413	14.1432	46.892	40.1547	0.2353	0.5901
4	4974	7.38666	8.69333	27.6415	31.9671	0.149	0.3789
4	4916	9.68471	13.4667	54.2383	41.6142	0.3393	0.7417
4	4972	9.76742	14.2449	53.5019	41.1934	0.2805	0.7057
4	4938	7.86021	11.8007	39.169	37.3813	0.2652	0.6359
4	4969	9.49146	15.1501	65.7688	43.4846	0.3779	0.9561
4	4988	7.47508	9.8041	30.5498	35.1693	0.1715	0.4193
4	4979	8.16018	10.7618	37.821	34.9253	0.1911	0.4699
4	4973	5.57659	7.90508	21.6876	27.2562	0.1169	0.2714
4	4991	7.61908	13.1626	44.0204	36.7327	0.3247	0.662
4	4975	5.13783	7.55625	19.3794	26.2528	0.1195	0.245
4	4984	8.4386	9.57426	39.8303	34.1134	0.2016	0.5159
4	4932	7.2529	10.7721	32.4994	32.0672	0.2109	0.4446
4	4986	7.99601	10.3745	31.2999	30.0346	0.2056	0.4432
4	4964	4.70423	6.85663	17.4804	23.3932	0.118	0.2456
4	4962	9.46208	16.6237	64.0948	45.7597	0.5699	1.0674
4	4979	9.49287	15.2829	61.6229	45.7324	0.4332	0.9906
4	4982	7.3829	8.64272	30.587	29.2991	0.231	0.4405
4	4993	8.66272	13.9566	51.8359	39.9218	0.258	0.7052
4	4979	8.06319	12.8984	42.8394	37.5961	0.2645	0.6571
4	4985	7.63783	11.7757	29.7699	34.9536	0.1806	0.44
4	4985	9.15122	14.6086	54.9615	42.1626	0.2809	0.6918
4	4998	11.0097	16.2579	70.4402	50.3238	0.5005	1.089
4	4992	11.2059	16.8592	70.1374	48.73	0.6038	1.2556
4	4972	11.8449	16.1093	71.7751	52.583	0.4819	1.1337
4	4989	10.2973	13.0737	48.4485	41.302	0.4395	0.9037
4	4993	9.04502	15.3355	51.8055	44.1428	0.4236	0.9374
4	4985	5.63808	8.58118	21.8413	27.041	0.1391	0.3012
4	4987	7.79587	10.4185	42.2899	37.2338	0.2947	0.6248
4	4980	7.64301	11.6924	35.0097	34.3912	0.2034	0.4751
4	4983	9.45011	11.5928	37.1581	37.0014	0.2404	0.5326
4	4991	7.80482	10.2596	35.1463	36.449	0.2053	0.4904
4	4975	9.86574	15.2262	53.4012	44.3327	0.2633	0.6793
4	4959	6.41032	9.80329	23.0827	29.6425	0.135	0.3002
4	4974	9.17656	13.7817	58.2531	44.0789	0.35	0.8523
4	4988	8.40806	12.2412	49.0405	40.5553	0.356	0.7547
4	4980	8.60147	12.5519	46.5565	40.2457	0.3455	0.743
4	4964	5.15699	8.14286	21.8992	25.0489	0.1348	0.3184
4	4935	5.80836	9.51492	22.4721	30.5718	0.1366	0.3206
4	4981	6.26828	9.21553	26.0406	28.6513	0.1166	0.2835
4	4988	8.82169	13.9472	60.7684	43.5337	0.3999	0.8914
4	4943	10.5934	16.1855	60.4004	47.7739	0.3798	0.8744
4	4978	6.84285	10.1448	27.9868	29.9671	0.1477	0.3778
4	4971	9.44385	14.8626	56.3868	42.3431	0.2868	0.69
4	4988	8.53362	12.4003	47.8152	40.2643	0.2648	0.6704
4	4987	9.72339	12.6327	50.8425	41.8365	0.355	0.8085
4	4955	7.95827	12.5785	46.3175	39.6096	0.2269	0.6144
4	4901	9.13109	13.8874	55.7411	43.2013	0.3949	0.9113
4	4509	4.94995	5.87482	13.4793	20.2683	0.0755	0.1838
4	4944	8.87315	14.5733	50.8589	44.1408	0.4086	0.8299
4	4975	11.3182	15.0584	62.4763	46.099	0.5129	1.0652
4	4926	10.7117	15.7387	74.6252	49.4702	0.6346	1.2315
4	4961	9.4023	14.818	65.2559	47.5718	0.492	0.9615
4	4969	6.68952	10.2676	26.5403	28.6199	0.1369	0.3478
4	4982	7.86934	11.4731	39.8728	32.9618	0.273	0.5846
4	4980	6.71263	8.87897	28.5115	31.8261	0.1542	0.3876
4	4987	6.76027	10.5713	34.895	30.5866	0.1644	0.4006
4	4985	6.27848	10.659	23.7337	27.4326	0.1152	0.3149
4	4979	5.97443	9.08529	23.7134	26.8289	0.1282	0.3082
4	4985	6.9722	9.35174	24.5331	29.3958	0.128	0.3085
4	4984	6.06185	9.27856	25.6101	27.0869	0.1356	0.3249
4	4979	7.78951	10.3348	45.2995	37.334	0.3651	0.7505
4	4994	10.6269	17.3938	67.7002	47.1962	0.5436	1.0847
4	4951	8.28476	13.994	53.9806	38.8227	0.294	0.6804
4	4954	5.69312	8.69607	21.4113	26.6389	0.1159	0.2862
4	4961	9.61334	13.6189	55.301	43.3948	0.3161	0.7815
4	4983	10.7088	13.5835	61.5583	43.1989	0.3597	0.8069
4	4969	5.83699	8.20894	18.7842	24.8037	0.0881	0.215
4	4974	8.66872	9.54952	33.901	37.7649	0.1836	0.4808
4	4994	7.05108	10.4734	40.1596	35.4527	0.219	0.5771
4	4981	6.68593	8.56869	25.7346	28.0375	0.1219	0.3034
4	4984	8.11325	12.4155	35.6699	38.401	0.231	0.5305
4	4959	11.3773	14.1427	56.7607	47.1117	0.4716	0.9329
4	4984	9.84763	12.7075	47.1137	42.588	0.3654	0.7479
4	4980	9.52665	13.2612	52.7665	40.5368	0.4486	0.9059
4	4983	8.93519	13.3903	46.9255	40.7132	0.3123	0.701
4	4985	10.5305	14.2865	63.644	44.7572	0.4666	0.9366
4	4988	9.33766	15.0108	57.0447	42.3365	0.4287	0.9426
4	4993	11.9089	19.3544	84.3569	53.7585	0.7301	1.49
4	4945	8.00747	11.2901	40.0842	36.9201	0.308	0.6242
4	4985	10.3297	15.0442	56.5064	43.6497	0.416	0.951
4	4995	11.1762	17.6715	75.4139	51.0447	0.6247	1.3282
4	4974	9.90782	15.1174	65.2413	45.5331	0.3543	0.8992
4	4974	8.4068	12.3635	41.8369	36.89	0.2683	0.6242
4	4995	10.717	15.1109	70.4019	46.6134	0.4123	1.0358
4	4995	8.04819	11.9808	30.8234	37.3133	0.1865	0.4082
4	4972	9.2132	14.1501	63.3766	47.019	0.3426	0.8783
4	4993	10.968	17.6405	81.0019	51.3192	0.501	1.1143
4	4985	6.67823	10.5674	36.9433	32.9032	0.1928	0.5055
4	4981	7.41678	11.7402	37.2008	34.2866	0.2827	0.5877
4	4984	10.5113	16.3605	71.5555	48.9055	0.5761	1.2074
4	4913	8.52682	11.245	37.9153	35.0852	0.1813	0.4775
4	4986	8.79025	13.2007	52.6998	41.8423	0.4342	0.9034
4	4985	8.72951	12.6022	47.688	42.7692	0.2698	0.7295
4	4991	7.47024	11.5857	28.9276	33.1753	0.1901	0.4276
4	4990	10.8654	14.8026	64.8393	47.0536	0.3925	1.0064
4	4972	7.23793	8.81079	29.3643	29.9872	0.1307	0.3499
4	4984	11.2985	15.421	68.1069	49.9587	0.5198	1.116
4	4955	11.1008	15.9616	72.9858	48.4548	0.6038	1.2389
4	4922	7.33886	10.9206	29.2705	31.4531	0.1512	0.412
4	4988	8.49253	11.2609	44.0166	38.7987	0.2134	0.6179
4	4991	7.50502	9.83933	30.7046	33.3996	0.1638	0.422
4	4984	9.33835	13.0676	50.1078	41.8086	0.2764	0.6551
4	4974	6.37427	6.669	20.3903	25.3608	0.0972	0.266
4	4973	8.13515	11.1252	35.8582	38.2538	0.1898	0.4478
4	4981	9.94307	16.932	65.511	49.3582	0.417	1.0024
4	4986	9.1213	13.1949	51.9245	37.8024	0.2852	0.7167
4	4987	8.55984	13.1728	48.1838	40.0357	0.2592	0.6188
4	4954	10.1357	15.5947	53.9563	45.7948	0.3647	0.799
4	4946	7.98228	9.25645	23.6778	34.2338	0.132	0.3024
4	4979	8.23205	11.5223	38.2248	38.6177	0.3062	0.6168
4	4983	8.54678	13.9552	44.4261	38.094	0.3196	0.7009
4	4992	10.8087	14.4778	65.8837	47.458	0.3823	0.9043
4	4989	8.13505	10.3377	35.3883	34.6603	0.2379	0.5026
4	4983	8.23283	10.9702	43.2645	38.092	0.3286	0.6757
4	4978	9.94671	12.017	51.2804	42.7608	0.3601	0.8423
4	4794	11.1236	15.7262	67.6818	46.0885	0.4574	1.0219
4	4970	9.01704	12.4713	38.3279	38.7547	0.214	0.5065
4	4981	8.00808	11.7868	37.1978	37.7024	0.224	0.5625
4	4984	8.07678	7.64135	23.3991	27.8488	0.1442	0.3119
4	4970	10.1964	14.1559	47.5319	44.2604	0.2304	0.5594
4	4973	7.02137	9.90313	22.6176	30.5477	0.164	0.3472
4	4992	8.1988	10.3573	34.4538	35.0827	0.2004	0.5084
4	4986	9.1034	12.8731	31.5345	38.2591	0.1729	0.393
4	4959	7.78591	11.3703	35.0867	35.4523	0.2167	0.5372
4	4996	5.76888	6.70578	16.625	25.496	0.099	0.2472
4	4978	7.52071	12.6015	40.484	34.4661	0.2439	0.5088
4	4947	9.49225	11.7632	44.8398	36.509	0.2649	0.6392
4	5007	8.54358	11.2983	46.1399	38.1145	0.3576	0.6952
4	4992	9.82828	13.2829	50.0695	39.27	0.3175	0.7146
4	4992	8.15082	9.32939	26.9017	35.0856	0.1506	0.3602
4	4980	7.96494	11.1055	42.6511	36.0558	0.3284	0.641
4	4965	9.61518	12.4524	49.9485	39.6278	0.3961	0.7381
4	4886	10.1106	15.1351	64.1091	45.8681	0.5194	0.9764
4	4965	5.94573	8.36489	22.5431	26.1667	0.1022	0.2422
4	4988	7.32962	11.3922	36.9014	33.7304	0.2244	0.4894
4	4990	6.88894	7.85777	24.8986	26.4022	0.1308	0.2849
4	4975	6.71696	9.85724	29.4912	32.5681	0.1683	0.4179
4	4987	10.4796	12.9353	51.2006	43.118	0.4202	0.8672
4	4985	8.04386	11.5941	29.5539	33.9762	0.1907	0.3964
4	5008	11.1622	16.0844	67.4884	48.1556	0.4865	1.0958
4	4983	9.16582	12.3048	46.4376	41.8333	0.401	0.8286
4	4990	10.3866	15.3079	64.5759	43.4897	0.4059	0.9957
4	4927	9.47033	13.3723	40.2668	43.2886	0.285	0.6162
4	4990	10.3475	16.1528	61.4449	47.2353	0.5562	1.17
4	4985	9.11327	13.2967	44.3558	40.3288	0.353	0.605
4	4980	5.83916	7.38578	15.7379	26.0311	0.0896	0.2
4	4928	7.95117	11.4839	37.4608	36.1494	0.2913	0.6229
4	4962	10.1958	14.2071	54.0781	45.2888	0.4561	0.9302
4	4936	8.87846	14.9996	53.9279	43.2488	0.3848	0.823
4	4971	8.98934	14.3311	43.6082	40.1693	0.2843	0.6251
4	4991	9.29489	12.9871	54.9694	42.9703	0.4136	0.9076
4	4994	10.4844	15.2354	64.8131	45.6917	0.3601	0.9413
4	4971	7.80803	9.0277	29.8327	34.1827	0.1581	0.4294
4	4984	8.75854	11.577	42.5877	39.0168	0.2697	0.651
4	4978	5.66797	8.13747	23.9796	25.5196	0.1603	0.3237
4	4948	8.68311	11.4075	45.9378	37.4945	0.382	0.7965
4	4909	10.1622	13.2483	55.522	45	0.2947	0.8016
4	4981	8.42525	10.7553	41.2349	35.0692	0.2529	0.6177
4	4991	8.69813	10.317	33.6056	36.6344	0.2049	0.5233
4	4978	11.1032	17.0084	72.8413	48.2651	0.5855	1.179
4	4984	7.17117	8.26529	27.7981	29.3198	0.2011	0.4006
4	4984	7.41952	10.1158	30.9642	31.2993	0.1636	0.4164
4	4988	8.13363	10.3484	36.1999	37.0838	0.2403	0.5365
4	4961	6.94573	7.77406	22.7255	24.8047	0.139	0.3249
4	4868	7.75771	11.4606	43.0209	37.8831	0.2727	0.6636
4	4978	7.87736	10.7091	40.7649	35.4967	0.2016	0.4889
4	4980	8.61803	13.4511	44.6386	37.3599	0.2085	0.5837
4	4950	10.8806	15.9725	72.3009	49.1035	0.5298	1.141
4	4981	6.26279	6.60009	19.7895	25.2132	0.1052	0.2744
4	4991	9.44646	12.3605	42.0154	35.2897	0.3045	0.6636
4	4994	10.5761	15.5739	65.0157	45.2621	0.4632	1.0358
4	4958	9.53751	15.1727	56.9349	43.0652	0.3581	0.8261
4	4991	7.85774	13.2729	50.4698	39.1935	0.2461	0.645
4	4991	8.50257	12.3846	38.0762	35.0095	0.1772	0.4813
4	4979	5.88374	6.63505	16.6105	24.6807	0.1101	0.2461
4	4965	5.89804	8.06441	27.6823	28.3843	0.1626	0.3971
4	4963	9.32433	11.5973	42.2706	37.8304	0.3361	0.6786
4	4988	9.51432	13.0189	46.4755	40.1054	0.3758	0.8151
4	4989	9.03248	12.7023	52.0972	40.9517	0.3101	0.8016
4	4970	8.75717	11.4212	46.0982	41.4059	0.358	0.669
4	4945	9.36748	13.1248	48.0095	40.1791	0.2567	0.7095
4	4983	6.63192	9.11926	30.6021	30.5162	0.1762	0.4209
4	4989	9.67271	14.7147	57.2738	44.9474	0.3716	0.8093
4	4989	5.44083	8.79108	25.4818	29.8263	0.1241	0.3253
4	4971	7.00323	9.97503	31.4628	31.1237	0.1915	0.4124
4	4990	9.84553	13.8489	56.7672	43.9205	0.4885	0.8831
4	4968	5.59426	7.53413	18.772	22.8204	0.0921	0.2363
4	4953	6.77086	8.44386	23.7391	28.8496	0.1098	0.2561
4	4980	9.22141	16.0794	59.9464	44.0203	0.3548	0.7985
4	4988	9.54362	14.0139	51.5632	44.2104	0.3314	0.7498
4	4932	8.53171	10.6356	42.3657	37.475	0.3067	0.6878
4	4963	6.50857	9.76179	28.98	33.7169	0.1795	0.4024
4	4972	10.3426	14.1024	60.3541	45.3351	0.4072	0.9249
4	4985	7.8158	11.8005	30.3043	34.8102	0.1864	0.4122
4	4989	9.02118	12.0923	49.5543	38.8001	0.3144	0.6561
4	4993	10.0346	16.0705	53.4654	45.9341	0.3541	0.8349
4	4984	9.0105	12.4877	42.5009	39.0632	0.2278	0.5105
4	4987	9.81871	15.3162	57.9709	42.7684	0.3152	0.7856
4	4991	9.3413	14.1916	53.5434	43.5585	0.47	0.8687
4	4987	6.58797	9.3086	23.3665	29.6114	0.1682	0.3683
4	4995	9.89984	17.3461	67.4929	47.2994	0.5042	1.0338
4	4981	10.1109	15.4676	62.4316	43.4954	0.4876	1.0705
4	4976	7.62784	9.01475	28.1417	29.7257	0.217	0.4574
4	4985	7.61887	12.6803	43.4134	38.2186	0.2639	0.6409
4	4992	9.4833	12.4189	47.4593	38.0017	0.2775	0.6777
4	4982	7.83778	9.59208	28.0979	34.0859	0.1996	0.4553
4	4976	9.53584	12.4928	54.0889	41.4355	0.4334	0.8534
4	4969	5.69085	8.68806	19.8244	27.7047	0.1054	0.2661
4	4948	9.54418	10.8856	44.9735	40.7458	0.2442	0.6644
4	4987	8.22944	10.0041	28.339	31.5549	0.1898	0.4258
4	4967	7.77612	8.86291	28.0038	32.0618	0.1683	0.3908
4	4969	11.7429	19.6837	97.0964	56.884	0.7985	1.5432
4	4965	10.0624	14.0855	63.6007	46.6082	0.4533	0.9578
4	4938	10.3771	15.2838	64.6825	47.2246	0.4186	0.9208
4	4984	8.0744	11.9401	38.1593	36.771	0.2297	0.5565
4	4988	9.99862	10.8138	38.0024	41.5456	0.2604	0.564
4	4962	10.0006	15.6287	56.8291	43.8662	0.3101	0.7645
4	4968	10.122	13.3372	45.8551	42.4514	0.3388	0.7145
4	4985	8.72553	10.7636	46.5978	36.6162	0.2678	0.6552
4	4977	11.873	16.7467	66.8417	51.2791	0.3136	0.8424
4	4994	10.8939	17.8124	71.1252	50.9983	0.5206	1.2052
4	4985	9.09243	12.7558	44.0648	38.457	0.2845	0.6843
4	4987	11.8122	15.8615	72.7415	48.9701	0.403	1.017
4	4981	6.41857	9.03152	22.6514	29.8274	0.1259	0.3098
4	4969	9.82199	14.8858	52.0985	41.3054	0.3392	0.8076
4	4959	9.0472	13.0087	41.6675	38.8494	0.249	0.5536
4	4945	8.09171	10.8239	39.1592	34.8032	0.2368	0.5557
4	4972	6.65158	9.09265	30.8611	30.6538	0.1963	0.4592
4	5015	10.1764	15.8132	75.2817	47.1297	0.4697	1.0841
4	4948	10.4373	14.9255	61.8173	44.5145	0.438	0.9432
4	4985	9.602	15.0249	50.8472	42.0025	0.3022	0.7297
4	4989	8.77858	12.7916	37.5781	36.7186	0.3094	0.5582
4	4986	9.16535	11.4105	38.9338	35.5845	0.3508	0.7197
4	4982	7.12155	7.52708	25.739	28.7595	0.157	0.3824
4	4981	8.43933	12.1186	40.3673	35.7479	0.3196	0.624
4	4977	8.05826	9.77656	38.2239	32.9014	0.1936	0.5146
4	4986	5.98852	9.13792	20.1851	25.7992	0.1112	0.2849
4	4973	7.36518	10.4787	25.416	29.5527	0.1899	0.4346
4	4991	10.2809	13.7636	62.127	42.1208	0.5034	1.0833
4	4990	9.60992	12.7308	56.1324	42.9649	0.2763	0.7706
4	4985	9.51713	13.1322	56.32	37.9811	0.3615	0.7925
4	4991	7.91482	12.2586	42.2664	34.2342	0.3137	0.6867
4	4986	9.64475	12.2676	52.9497	39.3007	0.3381	0.7533
4	4992	10.4851	13.6602	60.7684	43.5337	0.4085	0.912
4	4990	7.69826	10.4604	37.2701	36.8448	0.2491	0.5656
4	4991	9.88093	15.4471	64.9313	44.0073	0.4654	1.0406
4	4978	6.87263	10.0211	34.9706	31.4792	0.174	0.4517
4	4991	8.29789	12.1204	44.725	36.3327	0.2388	0.5903
4	4993	9.77841	15.3569	59.0154	43.5367	0.373	0.8149
4	4980	7.44805	11.6808	33.9075	31.3619	0.2064	0.4209
4	4991	8.70981	13.9358	48.309	38.1624	0.3089	0.7511
4	4985	5.88757	7.37722	19.8292	25.5628	0.1398	0.3118
4	4986	11.117	16.4514	67.0818	46.509	0.4586	1.0402
4	4983	6.82235	9.79168	26.7117	29.0546	0.1861	0.3966
4	4991	9.18176	10.3975	40.7101	36.2855	0.2092	0.5204
4	4984	11.673	17.1641	74.2327	50.2728	0.563	1.2478
4	4983	5.96261	7.61802	17.264	23.3179	0.0897	0.2163
4	4970	6.24456	8.67647	21.3794	27.6864	0.1227	0.2739
4	4989	11.1041	16.484	66.9179	46.5804	0.4781	1.1242
4	4957	9.55156	11.985	46.2791	39.2973	0.2382	0.6279
4	4989	9.94352	13.3418	53.2198	43.5534	0.2363	0.6576
4	4981	10.9773	13.9736	73.4587	46.0721	0.4901	1.1544
4	4983	6.785	8.21096	25.9836	28.2512	0.1663	0.3887
4	4987	10.474	17.185	68.3527	45.5133	0.3345	0.8692
4	4983	9.86283	14.6834	52.7045	40.5888	0.324	0.7271
4	4975	8.81297	11.9363	45.6579	36.7906	0.2673	0.6147
4	4991	9.68829	13.9425	53.5534	39.5311	0.3968	0.8725
4	4991	10.5675	14.3223	63.1738	43.2271	0.5358	1.0542
4	4957	9.53672	12.6148	50.9459	39.6707	0.3132	0.7032
4	4977	7.94223	10.8098	36.8101	32.5132	0.1915	0.5146
4	4986	8.89652	12.4286	43.7025	37.4645	0.2031	0.5394
4	4989	7.28771	9.25557	26.6504	29.1774	0.1609	0.3777
4	4992	9.83155	12.5485	67.1722	41.4946	0.5892	1.2134
4	4993	10.2907	14.9771	61.0595	45.9491	0.5329	1.1496
4	4988	8.57378	10.2727	35.0579	35.4765	0.1741	0.4749
4	4966	8.96809	14.1892	47.0197	39.9626	0.244	0.5839
4	4993	7.48448	11.3755	36.9308	32.8918	0.1887	0.483
4	4991	11.3182	17.2481	72.1385	48.7683	0.5528	1.2088
4	4986	9.62042	13.6548	46.1492	38.9666	0.3138	0.7187
4	4977	7.70901	11.4901	37.4884	34.0118	0.1802	0.49
4	4979	7.45251	10.6492	36.8814	33.1151	0.1835	0.481
4	4995	11.7199	16.3463	72.3035	49.9598	0.4712	1.1134
4	4970	8.49276	10.6808	33.134	36.3811	0.2211	0.541
4	4987	10.8253	16.0865	56.3095	46.1733	0.3813	0.8681
4	4967	8.35903	12.9956	47.113	38.5599	0.3449	0.7792
4	4987	9.29865	12.3236	49.9615	40.8551	0.2758	0.7402
4	4981	10.1743	14.5362	56.3527	43.7418	0.3025	0.818
4	4984	9.39017	12.0802	46.3947	39.1648	0.2571	0.665
4	4996	10.6826	15.7237	63.0174	44.8439	0.3788	0.8951
4	4989	9.20854	12.6146	47.7854	38.4318	0.2921	0.7134
4	5001	11.6481	17.3355	70.6171	49.8829	0.4725	1.14
4	4983	6.94906	8.78075	25.076	29.9959	0.1285	0.3356
4	4959	9.18424	15.7692	60.6669	45.4329	0.4764	1.0114
4	4994	9.50897	16.5713	68.0449	46.0751	0.5425	1.1226
4	4990	7.54732	11.0643	37.5139	35.0539	0.2672	0.5769
4	4981	9.297	13.3449	46.5111	39.4575	0.2903	0.6534
4	4987	7.44869	8.70854	29.1917	28.4754	0.174	0.4212
4	4988	8.56957	13.3617	43.4001	38.1938	0.3017	0.6548
4	4991	6.93558	9.07603	34.3511	33.6088	0.1664	0.4688
4	4988	11.3425	14.3428	67.3055	48.9812	0.3238	0.8805
4	4978	8.61893	11.4167	39.0268	35.7987	0.2138	0.5411
4	4949	7.07387	9.71112	28.9574	29.1707	0.1953	0.4588
4	4981	8.55887	11.0799	42.2177	34.3896	0.2209	0.56
4	4987	7.47952	9.80459	31.3993	31.4868	0.195	0.4741
4	4987	10.698	13.6187	66.8736	45.6543	0.4618	1.0347
4	4979	9.88519	15.8732	62.4928	43.2149	0.3718	0.8658
4	5005	10.9327	19.1233	90.9348	56.3661	0.6146	1.363
4	4985	11.3508	15.7955	68.299	48.7605	0.429	1.0476
4	4975	6.27555	6.60511	22.2535	24.7317	0.1256	0.3076
4	4958	6.4992	10.3026	27.3669	28.6871	0.1341	0.2991
4	4988	7.1523	8.29292	24.5108	27.715	0.1216	0.3084
4	4990	9.98189	16.6259	64.1138	45.8479	0.4189	0.9917
4	4990	7.4717	12.8605	45.0943	37.0939	0.2293	0.5833
4	4990	8.13889	14.1201	50.1092	40.3618	0.3082	0.7258
4	4986	9.22481	14.2131	61.7031	43.5159	0.3643	0.8543
4	4986	9.01429	14.2479	50.3556	39.689	0.399	0.8556
4	4976	8.27591	11.5506	33.9685	33.9743	0.2194	0.5769
4	4994	10.3569	16.8385	70.5193	48.3016	0.3607	0.945
4	4948	12.2528	19.3091	80.9468	53.728	0.5493	1.1962
4	4989	7.11422	11.2572	41.6832	39.1548	0.2007	0.5355
4	4985	10.7732	14.3686	60.5695	42.1907	0.393	0.8957
4	4969	5.98594	7.73287	16.4375	26.2564	0.116	0.2633
4	4975	11.012	13.1422	41.418	43.6087	0.203	0.5164
4	4987	10.581	14.4869	62.0469	43.9525	0.4635	1.0115
4	4975	8.32355	10.6603	31.9696	31.6894	0.1898	0.4342
4	4988	8.60501	11.6774	41.0414	36.7455	0.298	0.6113
4	4946	8.3394	12.8248	40.9199	37.3243	0.28	0.5638
4	4987	9.06788	13.9881	53.3273	40.3473	0.3838	0.8397
4	4994	10.0994	14.224	63.7938	43.7036	0.4859	1.0604
4	4984	8.34181	12.8276	44.8644	36.3874	0.2608	0.6289
4	4994	8.61086	11.9067	45.7607	36.5629	0.2386	0.6298
4	4984	9.75041	12.1701	51.8046	39.3792	0.3428	0.8195
4	4987	8.53939	12.8965	45.1849	35.6215	0.2659	0.6295
4	4988	8.21189	10.8103	40.2144	33.3353	0.2202	0.5564
4	4986	5.49659	6.53612	15.4209	23.0209	0.0859	0.2201
4	4849	7.22082	10.2775	30.1273	31.6756	0.139	0.3686
4	4982	5.57229	7.16559	18.1014	22.4836	0.0997	0.259
4	4989	7.88364	11.6346	36.0327	33.2197	0.2055	0.5305
4	4994	10.6711	15.1506	66.4023	44.3964	0.5093	1.1205
4	4988	8.39267	12.6554	39.7264	35.6781	0.2775	0.6127
4	4984	5.7438	8.70458	23.6238	26.1727	0.1141	0.279
4	4990	9.87463	12.9776	49.9578	41.854	0.4009	0.8563
4	4980	6.62618	8.97754	25.4807	26.0044	0.1308	0.2974
4	4982	5.90752	7.15268	15.9115	23.0263	0.0882	0.2207
4	4995	8.80369	11.5364	44.0974	38.739	0.2418	0.6319
4	4971	6.19383	8.65878	19.3407	27.189	0.0947	0.2224
4	4992	8.45508	11.5269	43.2558	35.2121	0.2324	0.6038
4	4979	7.90821	11.4701	38.7184	33.232	0.1994	0.5374
4	4979	5.58735	8.10451	22.5122	24.3122	0.1263	0.3305
4	4920	5.27054	5.8288	16.5998	21.9529	0.0957	0.2366
4	4991	7.44588	10.8003	34.9677	31.8389	0.2187	0.5246
4	4994	7.7278	11.6594	37.0299	32.4038	0.2645	0.5742
4	4953	8.28787	10.3527	35.1449	31.4681	0.2589	0.5781
4	4889	12.5098	16.4006	96.3522	56.393	0.6436	1.4977
4	4977	7.12379	7.31308	21.9942	25.0828	0.1401	0.3
4	4978	8.19515	12.0185	39.8303	34.6496	0.2305	0.5881
4	4988	6.37318	8.12999	23.514	24.7317	0.1152	0.3141
4	4980	7.70421	10.4719	37.5383	32.4585	0.2054	0.6217
4	4995	9.2594	13.4604	54.7413	40.8773	0.3306	0.7804
4	4986	8.8164	11.7166	42.2792	36.4786	0.3273	0.672
4	4992	7.85456	13.5359	51.2451	37.5537	0.3624	0.7539
4	4974	8.42831	10.6728	38.8877	34.1463	0.2901	0.6229
4	4984	10.1689	11.9103	53.904	41.2183	0.4279	0.9072
4	4979	8.04776	10.1263	37.7898	32.7739	0.2016	0.508
4	4974	7.59643	10.7646	35.2674	30.8232	0.1906	0.5001
4	4977	10.4968	13.7543	62.3187	44.3831	0.3674	0.8642
4	4995	8.59195	12.1788	45.2381	35.1541	0.3266	0.6605
4	4987	7.18444	9.83681	30.2522	29.6646	0.1445	0.4106
4	4978	8.95177	11.643	44.3856	36.358	0.2657	0.6409
4	4983	9.10407	13.3482	51.4419	37.6197	0.3272	0.7747
4	4990	8.65323	11.8894	39.0294	34.3093	0.2165	0.5445
4	4992	6.57238	8.52422	24.5706	25.8771	0.1267	0.3229
4	4025	7.68711	9.55545	32.2977	30.7148	0.1976	0.5006
4	4958	7.30782	9.76561	31.6229	31.0882	0.1658	0.4175
4	4974	7.44344	10.1908	36.5475	31.4338	0.1903	0.4887
4	4972	6.23446	7.74589	20.826	24.9938	0.1036	0.256
4	4984	9.08301	13.0857	47.3353	39.7757	0.3589	0.8022
4	4983	7.43102	10.1911	31.213	29.8443	0.1566	0.4799
4	4986	10.3084	13.8045	59.453	42.339	0.477	0.9964
4	4991	10.0374	14.4405	59.795	41.4174	0.4447	0.9767
4	4948	10.5148	15.8732	70.3277	47.0749	0.3901	0.9594
4	4991	9.82256	15.2512	59.6714	43.2045	0.3294	0.8119
4	4977	9.06994	12.7855	55.4039	40.8517	0.3328	0.7098
4	4986	9.53862	13.0848	50.2127	38.8319	0.3438	0.6908
4	4984	8.14397	11.4293	37.4125	32.1531	0.2324	0.5244
4	4979	6.89896	9.82271	27.7761	28.5478	0.1659	0.3977
4	4995	10.3986	14.0986	63.8527	46.21	0.4993	0.9623
4	4974	6.65621	8.86834	28.8074	28.0918	0.1864	0.4487
4	4979	9.31608	13.4691	51.8606	39.7933	0.2952	0.7179
4	4988	8.04328	10.753	34.9798	32.3831	0.2504	0.5603
4	4964	7.27311	8.85471	30.1491	30.4378	0.2052	0.433
4	4979	7.79353	11.1088	37.3998	31.9484	0.2138	0.5204
4	4985	9.82492	17.6439	79.1155	48.7439	0.4533	1.1149
4	4961	11.9318	16.8892	78.1044	50.3487	0.4813	1.0708
4	4902	5.24354	6.63721	17.5542	21.9915	0.078	0.2079
4	4983	11.8546	16.4795	66.5102	47.9232	0.4387	0.9312
4	4983	10.2179	14.1162	40.7735	43.1291	0.2084	0.4849
4	4991	10.9423	16.6305	65.5865	48.1352	0.3301	0.9091
4	4990	10.3725	17.1216	81.9107	54.3484	0.4038	1.0806
4	4924	12.346	18.6177	86.1162	53.8311	0.5904	1.4018
4	4986	11.5338	14.9659	71.8778	50.189	0.3955	0.9779
4	4989	13.7686	19.6795	81.9641	59.3529	0.4506	1.1483
4	4984	10.9088	12.8685	60.463	47.6428	0.3489	0.7921
4	4984	11.304	14.9104	62.589	49.6915	0.3018	0.8086
4	4941	12.2554	19.1848	80.7927	53.5291	0.5377	1.2328
4	4991	8.18192	14.5412	47.661	42.5444	0.298	0.7067
4	4964	9.27033	13.756	51.424	42.3298	0.2696	0.6786
4	4991	7.63801	11.838	47.0492	38.3898	0.2333	0.5826
4	4945	9.40328	14.5541	49.6526	40.7948	0.2821	0.7048
4	4959	8.41991	10.4527	33.5666	35.6194	0.1613	0.444
4	4991	11.3988	14.0533	65.3243	50.518	0.3097	0.8505
4	4881	8.16695	10.735	34.8061	34.3008	0.1534	0.401
4	4996	9.71394	13.111	54.3303	43.1006	0.246	0.6837
4	4993	13.1708	16.734	77.1462	56.836	0.403	1.0729
4	4992	11.5349	13.3061	47.6983	47.8398	0.26	0.6239
4	4987	9.63494	16.1803	61.0912	44.5266	0.3254	0.8159
4	4938	10.5991	14.5871	71.8844	47.9378	0.429	1.0041
4	4995	9.70314	15.5896	51.8389	44.3561	0.2799	0.7104
4	4984	10.2188	15.8021	66.2039	44.946	0.4071	0.9604
4	4997	11.5789	16.6188	70.4635	48.5548	0.3839	1.0053
4	4944	10.6886	13.6861	59.3558	43.7047	0.3392	0.8149
4	5017	7.89098	9.41202	26.1236	34.5352	0.1474	0.3552
4	5007	8.96007	12.271	40.8143	36.162	0.1988	0.5161
4	4991	9.09456	11.7226	46.2497	37.0341	0.263	0.62
4	4989	12.4899	18.1325	94.9868	56.7195	0.6189	1.4173
4	4987	11.6076	15.25	62.0672	49.3733	0.3334	0.8126
4	4992	9.79399	11.7242	47.3294	39.1322	0.2756	0.6706
4	4977	8.0491	11.0988	36.5169	33.6988	0.2046	0.5375
4	4985	9.95731	11.9107	51.8584	43.0652	0.2541	0.7045
4	4967	9.64284	14.0774	56.9127	42.5724	0.2828	0.706
4	4980	7.55303	10.794	34.9871	31.8986	0.1911	0.4572
4	4986	8.13488	11.2669	46.8943	40.349	0.2681	0.6456
4	4982	9.24112	11.7677	45.4085	38.1325	0.2419	0.6303
4	4986	10.863	16.6013	65.935	46.1695	0.4423	1.0557
4	4985	8.87899	12.0971	34.6412	37.3163	0.1662	0.452
4	4987	10.1296	13.4378	54.8105	41.4793	0.2833	0.8118
4	4987	10.2483	16.0938	55.6377	44.8969	0.2833	0.7118
4	4977	6.65291	9.38853	24.8481	27.5823	0.147	0.3492
4	4985	8.37105	13.3756	43.9573	38.2293	0.258	0.6038
4	4988	7.43734	10.3668	32.6478	34.5313	0.173	0.4603
4	4923	10.3652	16.068	66.494	45.902	0.401	0.9461
4	4929	7.98057	11.2876	41.7207	38.6846	0.2007	0.5081
4	4990	13.2785	20.1896	86.654	57.5526	0.4459	1.0591
4	4908	8.44067	12.9085	42.2306	39.2444	0.2107	0.4847
Dataset codes 1 and 2 represent the spring and summer leaves of Alangium chinense, respectively;
Dataset codes 3 and 4 represent the spring and summer leaves of Liquidambar formosana, respectively.
n represents the number of data points on the leaf edge.
